1                   **The COP9 Signalosome Suppresses Cardiomyocyte Necroptosis**

2

3       Peng Xiao, Ph.D.<sup>1\*</sup>, Changhua Wang, M.D., Ph.D.<sup>1\*</sup>, Megan T. Lewno, B.S.<sup>1</sup>, Penglong  
4       Wu, M.D., Ph.D.<sup>1,2</sup>, Jie Li, M.D., Ph.D.<sup>1,3</sup>, Huabo Su, Ph.D.<sup>1,3</sup>, Jack O. Sternburg, B.S.<sup>1</sup>,  
5       Jinbao Liu, M.D., Ph.D.<sup>2</sup>, Xuejun Wang, M.D., Ph.D.<sup>1</sup>

6

7       Xiao P, COP9 signalosome suppresses cardiomyocyte necroptosis

8

9       <sup>1</sup>Division of Basic Biomedical Sciences, University of South Dakota Sanford School of  
10       Medicine, Vermillion, SD 57069, USA

11       <sup>2</sup>Guangzhou Municipal and Guangdong Provincial Key Laboratory of Protein Modification  
12       and Degradation, State Key Lab of Respiratory Disease, School of Basic Medical Sciences,  
13       Affiliated Cancer Hospital of Guangzhou Medical University, Guangzhou, Guangdong  
14       511436, China

15       <sup>3</sup>Vascular Biology Center and Department of Pharmacology and Toxicology, Medical  
16       College of Georgia, Augusta University, Augusta, GA 30912, USA

17       \*These authors contributed equally.

18       Address correspondence to: Dr. Xuejun Wang, Division of Basic Biomedical Sciences, Sanford  
19       School of Medicine of the University of South Dakota, 414 East Clark Street, Vermillion, SD  
20       57069, USA, phone: (01) 605 658-6345, e-mail: [Xuejun.Wang@usd.edu](mailto:Xuejun.Wang@usd.edu).

21       Total word count: 10,179

## 22 **Abstract**

23 **Background:** Loss of cardiomyocyte (CMs) due to apoptosis and regulated necrosis  
24 contributes to heart failure. However, the molecular mechanisms governing regulated  
25 CM necrosis remain obscure. The COP9 signalosome (CSN) formed by 8 unique  
26 protein subunits (COPS1 through COPS8) functions to deneddylate Cullin-RING  
27 ligases (CRLs), thereby regulating the functioning of the CRLs. Mice with CM-  
28 restricted knockout of *Cops8* (*Cops8-cko*) die prematurely, following reduced  
29 myocardial performance of autophagy and the ubiquitin-proteasome system (UPS) as  
30 well as massive CM necrosis. This study was aimed to determine the nature and  
31 underlying mechanisms of the CM necrosis in *Cops8-cko* mice.

32 **Methods:** We examined myocardial expression and activities of key proteins that  
33 reflect the status of the RIPK1-RIPK3 pathway, redox, and caspase 8 in *Cops8-cko*  
34 mice. Moreover, we used in vivo CM uptake of Evan's blue dye (EBD) as an indicator  
35 of necrosis and performed Kaplan-Meier survival analyses to test whether treatment  
36 with a RIPK1 kinase inhibitor (necrostatin-1) or an antioxidant (N-acetyl-L-cysteine),  
37 global knockout of the *RIPK3* or the *Ppif* gene, CM-restricted knockout of the *Nrf2*  
38 gene, or cardiac *HMOX1* overexpression could rescue the *Cops8-cko* phenotype.

39 **Results:** Compared with littermate control mice, myocardial protein levels of RIPK1,  
40 RIPK3, MLKL, the RIPK1-bound RIPK3, protein carbonyls, full-length caspase 8,  
41 Nrf2, Ser40-phosphorylated Nrf2 and BCL2, as well as histochemical staining of  
42 superoxide anions were significantly increased but the cleaved caspase 8 and the  
43 overall caspase 8 activity were markedly decreased in *Cops8-cko* mice, indicating that  
44 the RIPK1-RIPK3 and the Nrf2 pathways are activated and caspase 8 activation is  
45 suppressed by *Cops8-cko*. Continuous necrostatin-1 infusion initiated at 2 weeks of  
46 age nearly completely blocked CM necrosis at 3 weeks and markedly delayed  
47 premature death of *Cops8-cko* mice. *RIPK3* haploinsufficiency or cardiac-specific *Nrf2*  
48 heterozygous knockout discernably attenuated CM necrosis and/or delayed mouse  
49 premature death; conversely, *Ppif* knockout, N-acetyl-L-cysteine treatment, and  
50 cardiac overexpression of HMOX1 exacerbated CM necrosis and mouse premature  
51 death.

52 **Conclusions:** Cardiac Cops8/CSN malfunction causes RIPK1-RIPK3 mediated CM  
53 necroptosis in mice; sustained Nrf2 activation and reductive stress pivot  
54 cardiomyocytes to necroptosis when autophagy and the UPS are impaired; and the  
55 CSN plays an indispensable role in suppressing CM necroptosis.

56 **Key words:** COPS8; necroptosis; RIPK1; RIPK3; Nrf2; caspase 8; Ppif

57

## 58 **Introduction**

59 The COP9 signalosome (CSN) is a highly conserved protein complex formed by 8 unique  
60 protein subunits (COPS1 through COPS8). The known biochemical activity of the CSN is to  
61 serve as the deneddylase to remove NEDD8 from a neddylated cullin in the Cullin-RING ligase  
62 complexes (CRLs) via a process known as deneddylation.<sup>1</sup> The catalytic center of the CSN is  
63 harbored in COPS5 but COPS5 exerts proper deneddylation activity only when it is  
64 incorporated into the CSN holocomplex formed by all 8 subunits;<sup>2</sup> hence, loss of any of the  
65 COPS subunits will impair Cullin deneddylation. Cullin functions as a scaffold in CRLs which  
66 are the largest family of ubiquitin E3s and, by estimate, responsible for the ubiquitin-dependent  
67 degradation of approximately 20% of cellular proteins.<sup>3</sup> It has been suggested that CRLs play  
68 an important role in the degradation of misfolded proteins in the heart.<sup>4</sup> The Skp1-Cul1-F-box  
69 (SCF) E3s are the prototype of CRLs and classified as the CRL1 class. There are at least 7  
70 other classes of CRLs.<sup>5</sup> Cullin neddylation and deneddylation regulate the cyclic assembly and  
71 disassembly of CRLs, which is essential for remodeling CRLs to meet timely the need to  
72 ubiquitinate specific substrate proteins within the cell.<sup>6</sup> Thus the CSN by virtue of Cullin  
73 deneddylation plays an indispensable role in regulating the ubiquitination of a significant  
74 proportion of cellular proteins. We have previously reported that cardiomyocyte (CM)-  
75 restricted knockout (KO) of the *Cops8* gene (*Cops8*<sup>CKO</sup>) in mice initiated at the perinatal  
76 period leads to massive CM necrosis, dilated cardiomyopathy, and mouse premature death,  
77 which is preceded by perturbation of not only the ubiquitin-proteasome system (UPS) but also  
78 the autophagic-lysosomal pathway (ALP).<sup>7,8</sup> Similar findings were also observed in mice with  
79 adult-onset *Cops8*<sup>CKO</sup>.<sup>9</sup> The present study was performed to investigate why *Cops8* deficiency  
80 in CMs causes necrosis.

81 Morphologically, cell death can be generally classified into necrosis (AKA, lytic cell  
82 death) and apoptosis (AKA, non-lytic cell death).<sup>10</sup> Necrosis is featured by the loss of cell  
83 membrane integrity, which allows free entry of extracellular fluid into the cell. This process  
84 leads to cell swelling, rupturing, and subsequent releasing of cellular contents into the  
85 extracellular space; hence, necrosis will inevitably trigger inflammation. Conversely, apoptosis  
86 is a well-known and well-characterized form of programmed or regulated cell death that  
87 requires caspase activation via either the mitochondrial or the extrinsic pathway. When a cell

88 undergoes apoptosis in a tissue, the cell keeps its membrane sealed well and, even at the late  
89 stage, the apoptotic cell breaks into smaller pieces known as apoptotic bodies, each of which is  
90 capsuled by membrane. Hence, apoptosis generally does not trigger inflammation and is a  
91 much cleaner form of cell death than necrosis.<sup>11</sup> Recent advances in cell death research have  
92 further unveiled that a significant portion of necrosis can also be regulated cell death, known as  
93 regulated necrosis, of which death receptor-triggered necrosis is known as necroptosis.<sup>11</sup>  
94 Originally identified in caspase 8 deficient or inhibited cells, the induction of necroptosis by  
95 TNF $\alpha$  is now known to require the formation of necrosomes consisting of receptor interacting  
96 protein kinase 1 (RIPK1), RIPK3, and a pseudo-kinase termed mixed lineage kinase-like  
97 protein (MLKL). In the canonical pathway by which the activation of TNF $\alpha$  receptor 1  
98 (TNFR1) induces necroptosis, the kinase activities of both RIPK1 and RIPK3 are required to  
99 phosphorylate MLKL. Phosphorylated MLKL forms amyloid-like oligomers, which will then  
100 translocate and incorporate into the plasma membrane; ultimately, producing pores on the  
101 membrane which will lead to the cell swelling and plasma membrane rupture.<sup>11</sup> Ubiquitination  
102 plays an essential role in the regulation of both the kinase activity of RIPK1 and the activation  
103 of caspase 8. For example, in TNFR1 signaling, both K63-linked and methionine 1 linear  
104 ubiquitination of RIPK1 are required for the incorporation of RIPK1 into the complex 1 and  
105 thereby promote NF $\kappa$ B activation and cell survival,<sup>12, 13</sup> whereas K48-linked polyubiquitination  
106 of RIPK1 mediates its proteasomal degradation.<sup>14, 15</sup> Cullin3 (Cul3)-based polyubiquitination of  
107 caspase 8 drives full activation and processing of caspase 8, which leads to activation of the  
108 extrinsic apoptotic pathway.<sup>16</sup> However, it remains unclear how the malfunction of the CSN, a  
109 major regulator of CRLs, impacts these cell death pathways although ablation of various *Cops*  
110 genes and the chemical inhibition of the CSN are known to induce cell death.<sup>7-9, 17, 18</sup>

111       Loss of the cardiomyocyte (CM) as a result of apoptosis and/or various forms of  
112 regulated necrosis contributes to heart failure,<sup>11, 19</sup> a leading cause of disability and  
113 death in humans. Findings from analyzing biochemical markers of necroptosis in the  
114 myocardium of humans with end-stage heart failure resulting from myocardial infarction (MI) or  
115 dilated cardiomyopathy indicate an involvement of necroptosis in the development of heart  
116 failure.<sup>20</sup> A genetic variant in the *RIPK3* promoter region associated with increased *RIPK3*  
117 transcription may contribute to the poor prognosis of heart failure patients.<sup>21</sup> Animal  
118 experiments demonstrated an important role for necroptosis in post-MI remodeling,<sup>22</sup>

119 myocardial ischemia/reperfusion (I/R) injury, cardiotoxicity of doxorubicin treatment,<sup>23, 24</sup> and  
120 paraquat-induced cardiac contractile dysfunction.<sup>25</sup> Mechanistically, one elegant study has  
121 shown that cardiac necroptosis induced by I/R injury or doxorubicin treatment requires  
122 RIPK3 but not RIPK1 and MLKL; the upregulated RIPK3 phosphorylates and activates the  
123 calcium/calmodulin-dependent protein kinase II (CaMKII) and thereby opens mitochondrial  
124 permeability transition pore (MPT) to induce CM necroptosis.<sup>23</sup> However, more recent  
125 evidence suggests that the RIPK3-MLKL axis may still be important for myocardial  
126 necroptosis during I/R injury.<sup>24</sup> Myocardial I/R was shown to induce myocardial  
127 dysregulation of both strands (5p and 3p) of miR-223 in mice and this dysregulation induces  
128 cardiac necroptosis during I/R by acting on TNFR1 and other points upstream of RIPK3.<sup>26</sup>  
129 Consistent with the crucial role of transforming growth factor beta-activated kinase 1  
130 (TAK1) and TNFR-associated protein 2 (TRAF2) in TNFR1-triggered survival signaling,  
131 CM-restricted ablation of the gene encoding TAK1 or TRAF2 in mice causes CM apoptosis  
132 and necroptosis and thereby increases the propensity for heart failure.<sup>27, 28</sup> Taken together,  
133 these studies strongly support the proposition that CM necroptosis plays an important role in  
134 the development of heart failure from common etiologies such as ischemic heart disease,  
135 dilated cardiomyopathy, and perhaps hypertensive heart disease. Therefore, a better  
136 understanding of the molecular mechanisms governing CM necroptosis may provide new  
137 therapeutic strategies to prevent or more effectively treat heart failure.

138         The present study determined the nature and underlying mechanisms of the CM necrosis  
139 observed in Cops8<sup>CKO</sup> mice. It revealed that CM necrosis induced by Cops8 deficiency or CSN  
140 impairment was associated with increased interaction of RIPK1 with RIPK3, decreases in  
141 caspase 8 activation, and sustained activation of the Nrf2-BCL2 pathway. Moreover, inhibition  
142 of RIPK1 kinase activity and the haploinsufficiency of either RIPK3 or Nrf2, but not ablation  
143 of the gene encoding Cyclophilin D or augmentation of the antioxidant capacity, were able to  
144 significantly attenuate Cops8<sup>CKO</sup>-induced CM necrosis and delay mouse premature death.  
145 Hence, this study demonstrates that COPS8 deficiency or CSN impairment causes CM  
146 necroptosis in mice through activating the RIPK1-RIPK3 pathway, sustaining Nrf2 activation  
147 and impairing caspase 8 activation, which establishes Cops8/the CSN as a crucial suppressor of  
148 CM necroptosis and unravels novel mechanisms for cardiac UPS and ALP malfunction in  
149 injuring the heart. To our knowledge, this study also provides the first demonstration that

150 sustained Nrf2 activation and reductive stress can steer cardiomyocytes to necroptosis when  
151 autophagy and the UPS are malfunctioned, a combination that is frequently implicated in  
152 human heart disease.

153

## 154 **Materials and Methods**

### 155 **Animal models**

156 Perinatal cardiomyocyte-restricted ablation of the *Cops8* gene (*Cops8*<sup>CKO</sup>) was achieved in  
157 C57BL/6J inbred mice as we previously reported.<sup>7</sup> The creation of RIPK3 null mice was  
158 previously described.<sup>29</sup> Mice with germline knockout of the *Ppif* gene (encoding Cyclophilin D)  
159 were provided by Dr. Jeffrey Molkenin of University of Cincinnati.<sup>30</sup> The floxed mutant mice  
160 harboring *loxP* sites flanking exon 5 of the *Nfe2l2* gene which encodes Nrf2 (*Nrf2*<sup>fllox</sup>; Stock No.  
161 025433) were purchased from Jackson Laboratory (Bar Harbor, Maine). A mouse model with the  
162 conditional human heme oxygenase 1 (*HMOX1*) overexpression cassette knocked in the *Rosa26*  
163 loci, known as the R26-(CAG-LNL-HMOX)1 mouse, was newly created by Shanghai Biomodel  
164 Organism Science & Technology Development Co., Ltd (Shanghai, China). The targeting vector  
165 and targeting strategy are illustrated in **Supplementary Figure S1**. This mouse model allows  
166 tissue-specific overexpression of HMOX1 when the *loxP*-flanked expression blocker sequence  
167 (“LNL”) is removed by a transgenic Cre that is expressed in the tissue, in which HMOX1  
168 overexpression is controlled by the CAG promoter.<sup>31</sup> We confirmed cardiac overexpression of  
169 the HMOX1 protein in mice harboring both the HMOX1 and the Myh6-Cre transgenes  
170 (**Supplementary Figure S2**). Genotypes of mice were determined with PCRs using toe or tail  
171 DNA and specific primers (**Supplementary Table S1**).

172 The animal care and use protocols (12-12-12-15D, 01-01-16-19D) for this study were approved  
173 by the Institutional Animal Care and Committee of the University of South Dakota and followed  
174 the NIH guide for the care and use of laboratory animals.

175 Mice were either used for Kaplan-Meier survival analyses or euthanized at 2 or 3 weeks of age  
176 for tissue sampling. Unless specified otherwise, mouse ventricular myocardium was stored in

177 RNA-Later for subsequent RNA extraction, snap-frozen in liquid nitrogen and stored in -80°C  
178 for subsequent protein analyses, or perfusion-fixed in situ for histopathological assessment.

### 179 **Evan's blue dye (EBD) uptake assay**

180 Detection of CM necrosis in mouse hearts was performed as reported.<sup>8</sup> In brief, at 3 weeks of age  
181 when the homozygous Cops8<sup>CKO</sup> mice begin to show massive CM necrosis,<sup>7</sup> mice were injected  
182 with EBD (100 mg/kg, i.p.). Eighteen hours after injection, the mice were anesthetized via  
183 isoflurane inhalation; in situ retrograded perfusion-fixation via the abdominal aorta was carried  
184 out sequentially with 0.9% normal saline and 3.8% paraformaldehyde dissolved in phosphate-  
185 buffered saline (PBS). The atria were trimmed, and the fixed ventricles were processed for OCT  
186 embedding and subjected to cryosectioning. A series of 7-µm cryosections were collected from  
187 the base to the apex of the ventricles. One in every 50 sections was stained for F-actin with  
188 Alexa-488 conjugated phalloidin to identify CMs and subjected to imaging with a confocal  
189 microscope (Olympus Fluoview 500). The images of each ventricular tissue ring were  
190 reconstructed by overlapping images from individual fields and used for quantification of EBD-  
191 positive area (red fluorescence) and total F-actin positive area (green fluorescence).

### 192 **Necrostatin-1 (Nec-1) treatment**

193 At 2 weeks of age, Cops8<sup>CKO</sup> mice were continuously administered Nec-1 (BML-AP309, Enzo  
194 Life Science; 1.56 mg/kg/day) or vehicle (10% DMSO in PBS) by intraperitoneal implantation  
195 of osmotic mini-pumps (Alzet Model 1002, designed for continuous drug delivery for 2 weeks).  
196 Two cohorts of mice were included. For CM necrosis analysis using the EBD uptake assay as  
197 described above, one cohort of mice was sacrificed 7 days after implantation of the mini-pump.  
198 The other cohort was used for Kaplan-Meier survival analysis.

### 199 **N-acetyl-L-cysteine (NAC) treatment**

200 At 2 weeks of age, Cops8<sup>CKO</sup> mice were injected daily for 7 consecutive days with NAC (100  
201 mg/kg/day, i.p.) or vehicle (PBS, pH7.2) before they were subjected to the EBD uptake assay as  
202 described above.

### 203 **Dihydroethidium (DHE) staining for reactive oxygen species (ROS)**



204 Mouse hearts were perfused *in situ* and excised in PBS, embedded in OCT and rapidly frozen.  
205 Serial cryosections (10  $\mu\text{m}$  thick) were mounted onto glass slides. The slides were air-dried and  
206 incubated with 2.5  $\mu\text{M}$  DHE (12013, Cayman Chemical, USA) in PBS at 37°C for 30 min. DHE  
207 produces a red fluorescence when oxidized to ethidium bromide by the superoxide anion.<sup>32</sup> The  
208 slides were then examined and imaged with a confocal microscope (Olympus Fluoview 500)  
209 using a 20X objective. Three mice per genotype, 5 representative tissue sections per heart, and 2  
210 micrographs randomly collected from each section were analyzed. The average density of  
211 fluorescence derived from DHE in each confocal micrograph was used as the indicator of ROS  
212 content.

### 213 **Western blot analyses**

214 Total proteins were extracted from frozen myocardium. Protein concentration was measured  
215 using the BCA assay. Proteins fractionated via SDS-PAGE were electro-transferred onto PVDF  
216 membrane, immuno-probed for specific proteins using primary and horseradish peroxidase-  
217 conjugated secondary antibodies, detected with the enhanced chemiluminescence (ECL) method  
218 (RPN2235, Fisher Scientific, USA) as previously reported.<sup>33</sup> The stain-free total protein imaging  
219 technology was used to collect in-lane loading controls for experiments, when appropriate.<sup>34</sup> The  
220 antibodies used include anti-COPS8 antibody (rabbit, BML-PW8290-0100, Enzo Life Science  
221 Inc., USA), anti-RIPK1 antibody (mouse, ab72139, Abcam, USA), anti-RIPK3 antibody (rabbit,  
222 14401s, Cell Signaling Technology, Inc., USA), anti-MLKL antibody (rabbit, ab194699, Abcam,  
223 USA), anti-Tubulin antibody (mouse, 10806, Sigma-Aldrich, USA), anti-DNP antibody (rabbit,  
224 71-3500, Invitrogen, USA), anti- $\alpha$ -Actinin antibody (mouse, A7811, Sigma-Aldrich, USA), anti-  
225 Cullin 3 antibody (rabbit, NB100-58788, Novus, USA), anti-Nrf2 antibody (rabbit, sc-722, Santa  
226 Cruz Biotechnology, Inc., USA), anti-phospho-Nrf2 ( Ser40 ) antibody (rabbit, PA5-67520,  
227 Invitrogen, USA), anti-KEAP1 antibody (rabbit, 10503-2-AP, Proteintech Group, Inc., USA),  
228 and anti-caspase 8 antibody (rabbit, 4790s, Cell Signaling Technology, Inc., USA). BioRad  
229 VersaDoc 3000 or ChemiDoc MP and associated QuantityOne or ImageLab softwares (BioRad,  
230 Hercules, California, USA) were used for imaging and analyzing chemiluminescence and gel  
231 fluorescence.

### 232 **Co-immunoprecipitation (Co-IP) assays**

233 The co-immunoprecipitation was performed as previously described.<sup>35</sup> In brief, protein A/G  
234 PLUS-Agarose beads (sc-2003, Santa Cruz Biotechnology Inc., USA) were washed with a buffer  
235 (WGB buffer) containing 0.05M Hepes, 0.15M NaCl, and 1% Triton X-100 (pH 7.6) 3 times  
236 before being incubated with either anti-RIPK1 antibodies or control IgG for 2 hours at room  
237 temperature. The beads were then incubated at 4°C overnight with the crude proteins extracted  
238 from ventricular myocardium in the radioimmunoprecipitation assay (RIPA) buffer. The beads  
239 were then spun down, separated from supernatant, and further washed 3 times (5 min per wash)  
240 with the WGB buffer to remove unbound proteins; proteins bound on the beads were then eluted  
241 with SDS loading buffer (50 mM Tris-HCl at pH 6.8, 2% SDS, and 10% glycerol) and then  
242 boiled for 5 min. The eluted proteins were subjected to SDS-PAGE and western blot analyses for  
243 RIPK1 and RIPK3 with the western blot protocol as described above.

#### 244 **Protein carbonyl assays**

245 Protein carbonyl assays used the Oxidized Protein Western Blot Detection Kit (ab178020;  
246 Abcam, USA) and were performed as we previously described.<sup>36</sup> Briefly, ventricular  
247 myocardium was homogenized in RIPA buffer. After centrifugation, the supernatant was  
248 collected and supplemented with DTT (50 mM, final concentration). Protein samples were then  
249 mixed with the same volume of 12% SDS and incubated with an equal volume of the 1× 2,4-  
250 dinitrophenylhydrazine (DNPH) derivatization solution at room temperature for 15 min before  
251 reaction termination by addition of the neutralization solution. The carbonyl groups in the protein  
252 side chains are derivatized to 2,4-dinitrophenylhydrazone (DNP-hydrazone). The DNP-  
253 derivatized proteins were then subjected to SDS-PAGE and western blot analysis or loaded  
254 directly onto a PVDF membrane via a vacuum-assisted device and detected using dot blotting  
255 with an anti-DNP antibody.

#### 256 **Caspase 8 activity assays**

257 The activities of caspase 8 in myocardial crude protein extracts were measured using the  
258 Caspase-8 Colorimetric Assay Kit (K113, BioVision, Inc., USA).

#### 259 **Statistical analyses**

260 The presentation of quantitative data and the methods for statistical analyses are described in the

261 legend of each figure.

## 262 **Results**

### 263 **Key proteins of the necroptotic pathway are increased in Cops8<sup>CKO</sup> mouse hearts**

264 We have previously observed massive CM necrosis in mice with Cops8<sup>CKO</sup> initiated at either the  
265 perinatal or adult stage.<sup>7,9</sup> To explore the mechanism governing the CM necrosis in Cops8  
266 deficient hearts, we examined the potential involvement of the RIPK1-RIPK3 pathway. Western  
267 blot analyses revealed marked increases in myocardial protein levels of RIPK1, RIPK3, and  
268 MLKL in mice with perinatal Cops8<sup>CKO</sup> compared with littermate control mice (**Figure 1A, 1B**).  
269 Co-immunoprecipitation of RIPK1 detected increased association of RIPK3 with RIPK1 in  
270 Cops8<sup>CKO</sup> hearts compared with littermate controls (**Figure 1C, 1D**). Increased RIPK1-RIPK3  
271 interaction is a key step in the activation of the necroptotic pathway by death receptor  
272 engagement;<sup>37-39</sup> hence, these data suggest that the RIPK1-RIPK3 pathway is likely activated in  
273 Cops8 deficient hearts.

### 274 **Suppression of CM necrosis and delay of premature death by RIPK1 inhibition in** 275 **Cops8<sup>CKO</sup> mice**

276 To determine whether RIPK1 kinase activity is required for CM necrosis in Cops8<sup>CKO</sup> hearts, we  
277 tested the impact of necrostatin-1 (Nec-1), a RIPK1 kinase-specific inhibitor.<sup>40</sup> Since CM  
278 necrosis is detectable at 3 weeks of age, but not at 2 weeks, the administration of Nec-1 or  
279 vehicle control via intraperitoneal implantation of osmotic mini-pumps was initiated in Cops8<sup>CKO</sup>  
280 mice at 2 weeks of age. CM necrosis was assessed with the in vivo EBD uptake assay in the  
281 heart harvested 7 days after mini-pump implantation. EBD positive CMs were not detectable in  
282 mice with control genotypes (Myh6-Cre<sup>TG</sup>, Cops8<sup>FL/FL</sup>, and Cops8<sup>+/+</sup>; data not shown) but were  
283 readily detectable in homozygous Cops8<sup>CKO</sup> mice treated with vehicle control. Strikingly, the  
284 EBD positivity in Cops8<sup>CKO</sup> mouse hearts was nearly abolished completely by the Nec-1  
285 treatment (**Figure 2A, 2B**,  $p < 0.0001$ ), indicating that RIPK1 kinase activity is required for  
286 Cops8 deficiency to induce CM necrosis in mice. Moreover, Kaplan-Meier survival analyses  
287 revealed that Nec-1 treatment significantly delayed the premature death observed in Cops8<sup>CKO</sup>  
288 mice ( $p = 0.0072$ , **Figure 2C**). Taken together, these findings provide compelling evidence that

289 induction of CM necrosis by Cops8 deficiency requires RIPK1 kinase activity and the CM  
290 necroptosis is principally responsible for the premature death of Cops8<sup>CKO</sup> mice.

### 291 **Requirement of RIPK3 for CM necrosis in Cops8<sup>CKO</sup> mice**

292 To test the role of RIPK3 in the CM necrosis of Cops8<sup>CKO</sup> mice, RIPK3 germline knockout  
293 (RIPK3<sup>-/-</sup>) mice were cross-bred with Cops8<sup>CKO</sup> mice and the resultant Cops8<sup>CKO</sup>::RIPK3<sup>+/+</sup> and  
294 Cops8<sup>CKO</sup>::RIPK3<sup>+/-</sup> littermate mice were subjected to EBD CM necrosis assessment at 3 weeks  
295 of age as well as Kaplan-Meier survival analysis. The prevalence of EBD-positive CMs in  
296 Cops8<sup>CKO</sup>::RIPK3<sup>+/-</sup> mice was significantly lower than that of littermate Cops8<sup>CKO</sup>::RIPK3<sup>+/+</sup>  
297 mice ( $p=0.0007$ ; **Figure 3A, 3B**); also, the lifespan of the former was significantly longer than  
298 that of the latter ( $p<0.0001$ ; **Figure 3C**). These analyses show that RIPK3 haploinsufficiency is  
299 capable of markedly suppressing CM necrosis and delaying premature death in Cops8<sup>CKO</sup> mice,  
300 providing compelling evidence that RIPK3 is required for CM necrosis in Cops8<sup>CKO</sup> mice. The  
301 findings described so far also demonstrate that CM necrosis induced by Cops8 deficiency  
302 belongs to necroptosis and is mediated primarily by the RIPK1-RIPK3 pathway.

### 303 **CM necroptosis in Cops8<sup>CKO</sup> mice is independent of mitochondrial permeability transition** 304 **(MPT)**

305 By definition, necroptosis and MPT-driven necrosis are two different types of regulated  
306 necrosis;<sup>41</sup> however, it was previously reported that Nec-1 failed to show additional protection  
307 against myocardial I/R injury in Cyclophilin D knockout (*Ppif*<sup>-/-</sup>) mice,<sup>42</sup> inferring that MPT and  
308 RIPK1 might be involved in the same regulatory pathway. More recently, MPT was shown as a  
309 major player in the RIPK3-CaMKII-MPT pathway for the induction of myocardial necroptosis  
310 by I/R and doxorubicin.<sup>23</sup> Hence, we determined whether MPT-driven necrosis contributes to  
311 CM necrosis in Cops8<sup>CKO</sup> mice by testing whether ablation of the *Ppif* gene would mitigate the  
312 CM necrosis and mouse premature death induced by Cops8<sup>CKO</sup>. As presented in **Figure 4**,  
313 neither heterozygous nor homozygous knockout of the *Ppif* gene delayed the mouse premature  
314 death; on the contrary, homozygous *Ppif* knockout moderately increased CM necrosis ( $p=0.010$ )  
315 and accelerated mouse premature death ( $p=0.007$ ), indicating that MPT is not a mediator for CM  
316 necrosis in Cops8<sup>CKO</sup> mice.

317 **Cops8 deficiency increases myocardial oxidative stress but ROS scavenging fails to**  
318 **suppress CM necroptosis in Cops8<sup>CKO</sup> mice**

319 The level of superoxide anion ( $O_2^-$ ) in myocardial sections was probed with DHE incubation  
320 followed by fluorescence confocal microscopy. Upon exposure to superoxide anion, DHE is  
321 converted to 2-hydroxyethidium, which then intercalates into nuclear DNA and exhibits red  
322 fluorescence.<sup>32</sup> The red fluorescence intensity of the DHE-probed myocardial sections from  
323 homozygous Cops8<sup>CKO</sup> mice was remarkably greater than that from either Cops8<sup>FL/+</sup>::Myh6-  
324 cre<sup>TG</sup> (heterozygous Cops8<sup>CKO</sup>) or Cops8<sup>FL/FL</sup> control mice (**Figure 5A, 5B**), indicating that  
325 Cops8 deficiency increases myocardial superoxide levels. Myocardial reactive oxygen species  
326 (ROS) were also assessed via immunoblotting for DNPH-derivatized protein carbonyls.  
327 Immuno-probing of DNP in protein dot blots revealed that myocardial protein carbonyls were  
328 substantially higher in the homozygous Cops8<sup>CKO</sup> mice compared with heterozygous Cops8<sup>CKO</sup>,  
329 Cops8<sup>FL/FL</sup>, or Myh6-Cre<sup>TG</sup> mice (**Figure 5C, 5D**). Western blot analyses further showed that the  
330 increased carbonyls were mainly on proteins of a molecular weight ranging from 25 to 37 kDa  
331 (**Figure 5E**). These findings indicate that Cops8 deficiency in CMs increases myocardial  
332 oxidative stress.

333 Increased oxidative stress is considered a main factor for causing necroptosis. Since ROS was  
334 remarkably increased in Cops8<sup>CKO</sup> hearts, we sought to determine its contribution to the  
335 necroptosis by examining the impact of treatment with N-acetyl-cysteine (NAC), a widely used  
336 free radical scavenger, on the CM necrosis. Unexpectedly, NAC treatment failed to reduce EBD  
337 positivity in Cops8<sup>CKO</sup> hearts; on the contrary, it moderately increased CM necrosis ( $p=0.017$ ;  
338 **Figure 6A, B**). Heme oxygenase 1 (HMOX1) is an antioxidant. We next further tested whether a  
339 genetic method to increase anti-oxidative capacity in CMs would be effective in modulating the  
340 Cops8<sup>CKO</sup> phenotype by transgenic overexpression of HMOX1 in CMs. Kaplan-Meier survival  
341 analysis showed that cardiomyocyte-restricted overexpression of HMOX1 did not delay the  
342 premature death of Cops8<sup>CKO</sup> mice. On the contrary, the HMOX1 overexpressed Cops8<sup>CKO</sup> mice  
343 tended to show a shorter lifespan ( $p=0.044$ ; **Figure 6C**). Taken together, these data indicate that  
344 increasing reductive capacity via either pharmacological or genetic means tend to exacerbate  
345 cardiac pathology in Cops8<sup>CKO</sup> mice.

### 346 **Impaired caspase 8 activation and upregulated BCL2 in Cops8<sup>CKO</sup> hearts**

347 Since necroptosis was originally observed in TNF $\alpha$ -treated cells whose caspase 8 is defective or  
348 suppressed, we sought to examine myocardial expression and activity of caspase 8 in Cops8<sup>CKO</sup>  
349 mice. Both the cleaved/activated form of caspase 8 and the activities of caspase 8 were markedly  
350 lower but the abundance of the full-length caspase 8 was discernibly greater in the Cops8<sup>CKO</sup>  
351 hearts compared with littermate controls at 3 weeks of age (**Figure 7A ~ 7C**), which indicates  
352 that cardiac Cops8 deficiency suppresses caspase 8 activation; thereby, Cops8 deficiency  
353 suppresses the activation of the extrinsic apoptotic pathway. As we reported before, myocardial  
354 levels of BCL2, a key inhibitor of the mitochondrial apoptotic pathway, were significantly  
355 increased in 3-week-old homozygous Cops8<sup>CKO</sup> mice, compared with littermate control mice  
356 with heterozygous Cops8<sup>CKO</sup> and Cops8<sup>FL/FL</sup> littermates ( $p=0.0102, 0.0003$ ; **Figure 7D**).  
357 Myocardial BCL2 mRNA levels were also greater in homozygous Cops8<sup>CKO</sup> mice than littermate  
358 controls at both 2 and 3 weeks of age (**Figure 7E**). Taken together, these data support that Cops8  
359 deficiency suppresses apoptotic pathways.

### 360 **Contributions of increased Nrf2 to CM necroptosis in Cops8<sup>CKO</sup> mice**

361 Increased oxidative stress is known to activate the nuclear factor E2-related factor 2 (Nrf2).  
362 Indeed, our prior transcriptome analysis has revealed that Nrf2 target genes are markedly  
363 upregulated in Cops8<sup>CKO</sup> hearts.<sup>43</sup> Here our further work detected that myocardial protein levels  
364 of total Nrf2 and Ser40-phosphorylated Nrf2 (pS40-Nrf2) were significantly increased in  
365 Cops8<sup>CKO</sup> mice at 2 and 3 weeks of age, compared with littermate controls (**Figure 8A~8C**).  
366 Phosphorylation of Nrf2 by protein kinase C (PKC) at Ser40 is known to promote Nrf2 nuclear  
367 translocation and increase its target gene expression;<sup>44</sup> hence, the increases in pS40-Nrf2 are  
368 consistent with increased Nrf2 transactivation in Cops8 deficient hearts as we previously  
369 detected via transcriptome profiling.<sup>43</sup>

370 To test the role of increased Nrf2 in the CM necroptosis, we crossbred the Nrf2-floxed  
371 allele into Cops8<sup>CKO</sup> mice and performed Kaplan-Meier survival analysis among the littermates  
372 (**Figure 8D**). The lifespan of Cops8<sup>FL/FL</sup>::Nrf2<sup>FL/FL</sup>::Myh6-Cre<sup>TG</sup> was comparable to, but that of  
373 Cops8<sup>FL/FL</sup>::Nrf2<sup>FL/+</sup>::Myh6-Cre<sup>TG</sup> was significantly longer than, that of  
374 Cops8<sup>FL/FL</sup>::Nrf2<sup>+/+</sup>::Myh6-Cre<sup>TG</sup> mice ( $p=0.0078$ ), indicating that cardiomyocyte-restricted *Nrf2*

375 haploinsufficiency attenuates CM necroptosis induced by CM Cops8 deficiency in mice.

376

## 377 **Discussion**

378 The present study unveils for the first time that CMs deficient of Cops8 die primarily in the form  
379 of necroptosis. Mechanistically, by virtue of impairing CRL-mediated ubiquitination, Cops8  
380 deficiency impairs caspase 8 activation and sustains the activation of the Nrf2-BCL2 axis,  
381 thereby suppressing both extrinsic and intrinsic apoptotic pathways, which steers the death  
382 receptor-mediated signaling towards activation of the RIPK1-RIPK3-mediated necroptotic  
383 pathway. Findings of this study also demonstrate that the MPT does not play an important role in  
384 CM necroptosis induced by Cops8<sup>CKO</sup> in mice whereas sustained Nrf2 activation and reductive  
385 stress contribute to the induction of CM necrosis and cardiac malfunction by Cops8 deficiency in  
386 CMs. These discoveries not only establish the CSN as a crucial factor to suppress CM  
387 necroptosis but provide the first demonstration in any organs or systems that, in a UPS and  
388 autophagy impairment setting, sustained Nrf2 activation and reductive stress pivot the  
389 cardiomyocyte to necroptosis, both of which have highly significant clinical implications.

### 390 **Cops8 deficient or CSN inhibited CMs die primarily from necroptosis**

391 Massive CM necrosis occurs in Cops8<sup>CKO</sup> mice, as evidenced by rapid increases in EBD uptake  
392 by CMs in the absence of increased TUNEL positivity, as well as by the ultrastructural features  
393 like CM swelling and a broken plasma membrane.<sup>7-9</sup> Activation of RIPK3 is the centerpiece of  
394 necroptotic pathway although RIPK1 is also required in the induction of necroptosis by TNF $\alpha$  at  
395 least.<sup>45</sup> Unlike detection of apoptosis for which a series of relatively simple and specific assays  
396 have long been developed, the detection of necroptosis currently requires a combination of rather  
397 sophisticate tests to reveal both the necrotic feature (e.g., loss of plasma membrane integrity) and  
398 the dependence on RIPK3 activation, according to a recently published guideline.<sup>46</sup> In the  
399 present study, we found that CM necrosis in Cops8<sup>CKO</sup> mice were associated with increases in  
400 myocardial protein levels of RIPK1, RIPK3, MLKL, and RIPK1-bound RIPK3 (**Figure 1**) and  
401 were dependent on RIPK1 kinase activity (**Figure 2**) and increased expression of RIPK3 (**Figure**  
402 **3**), demonstrating unequivocally that the massive CM necrosis observed in Cops8<sup>CKO</sup> mice

403 belongs to necroptosis. Notably, in contrast to a recently delineated RIPK3-CamKII-MPT  
404 pathway to cardiac necroptosis,<sup>23</sup> MPT does not play a major role in the execution of CM  
405 necroptosis in Cops8<sup>CKO</sup> mice. This is because Cyclophilin D knockout, which is known to  
406 inhibit MPT, did not attenuate but rather exacerbated CM necrosis and premature death in  
407 Cops8<sup>CKO</sup> mice (**Figure 4**).

#### 408 **How does Cops8 deficiency cause CM necroptosis?**

409 The requirement of both RIPK1 and RIPK3 by the CM necrosis observed here suggests that the  
410 induction of CM necroptosis by Cops8CKO shares the same pathway taken by TNFR1 activation.  
411 The ligation of TNFR1 by TNF $\alpha$  can lead to at least 3 possible downstream events: (1) formation  
412 of complex 1 where RIPK1 serves as a scaffold in a manner independent of its kinase activity,  
413 which provides survival signals via activation of nuclear factor  $\kappa$ B (NF $\kappa$ B) and mitogen-  
414 activated protein kinases (MAPKs), (2) formation of complex 2a which induces apoptosis via  
415 caspase 8 and downstream cascade, and (3) formation of complex 2b (i.e., the RIPK1-RIPK3-  
416 MLKL) and thereby induction of necroptosis when caspase 8 is defective or inhibited.<sup>11</sup> The  
417 kinase activity of RIPK1 is required for RIPK1 to induce cell death in complex 2. UPS-  
418 dependent degradation of I $\kappa$ B $\alpha$  is a key step in the activation of NF $\kappa$ B by TNF $\alpha$  where the  
419 ubiquitination of I $\kappa$ B $\alpha$  is driven by Skp1-Cul1- $\beta$ -TrCP (SCF <sup>$\beta$ -TrCP</sup>),<sup>47</sup> a member of the CRL1  
420 family E3 ligases whose assembly and disassembly are regulated by the CSN; hence, the survival  
421 signaling from NF $\kappa$ B is likely suppressed by impairment of I $\kappa$ B $\alpha$  ubiquitination due to defective  
422 Cullin deneddylation resulting from Cops8 deficiency. Our prior study detected decreases in  
423 myocardial F-box protein  $\beta$ -TrCP protein levels in Cops8<sup>CKO</sup> mice,<sup>7</sup> adding a reason to predict a  
424 reduction of SCF <sup>$\beta$ -TrCP</sup> ligase activities. Thus, Cops8 deficiency swings TNFR1 signaling towards  
425 the cell death direction.

426 Then, the next question is why necroptosis instead of apoptosis takes place. At least in  
427 the case of induction of necroptosis by death receptor activation, two prerequisites must be met  
428 in the cell. First, the formation of the so-called complex 2 containing RIPK1 and RIPK3 and  
429 second, the failure of caspase 8 to activate.<sup>11</sup> Indeed, we observed that both prerequisites were  
430 met in the Cops8<sup>CKO</sup> hearts. Not only were RIPK1, RIPK3, and MLKL protein levels markedly  
431 increased but also RIPK1-interacted RIPK3 was significantly increased (**Figure 1**); and very



432 importantly the cleaved form of caspase 8 as well as caspase 8 activity were substantially lower  
433 in the homozygous Cops8<sup>CKO</sup> hearts compared with CTL hearts (**Figure 7**). It is very likely that  
434 this impairment of caspase 8 activation directly results from the loss of Cullin neddylation  
435 because a prior study has established that Cul3-RBX1 mediated polyubiquitination of caspase 8  
436 is required for further processing and activation of caspase 8 and the signaling of the extrinsic  
437 apoptotic pathway.<sup>16</sup> Both neddylation and deneddylation of Cullins are required for proper  
438 functioning of CRLs; hence, the ubiquitination of caspase 8 by Cul3-RBX1 is very likely  
439 suppressed by Cops8 deficiency. Besides caspase 8 which is essential to the extrinsic pathway of  
440 apoptosis, as discussed below, the mitochondrial pathway is likely suppressed by increased  
441 BCL2 (**Figure 8**).<sup>7</sup>

442 We have previously observed a suppressed autophagic flux in Cops8<sup>CKO</sup> mice. This could  
443 probably be due to impairment in autophagosome-lysosome fusion that occurs before  
444 impairment in the UPS degradation of a surrogate misfolded protein as well as CM necrosis  
445 become discernible.<sup>8</sup> We propose dual impairment of both the UPS and the ALP plays an overall  
446 causative role in the CM necrosis that now proves to be necroptosis. This proposition now has  
447 support from two recent studies that collected evidence from cultured H9c2 cells suggesting a  
448 major contribution from impaired autophagy to the induction of necroptosis by TNF $\alpha$ .<sup>48, 49</sup>  
449 According to these reports, RIPK1-RIPK3 interaction and necroptosis induced by the combined  
450 treatment with TNF $\alpha$  and z-VAD-fmk (a broad spectrum caspase inhibitor) were associated with  
451 suppression of autophagic flux,<sup>48</sup> improving autophagic flux via mTORC1 inhibition suppressed  
452 the necroptosis in an autophagy- and transcription factor EB (TFEB; a master regulator of the  
453 ALP)-dependent manner,<sup>48, 49</sup> and MPT does not to play a major role in the execution of  
454 necroptosis.<sup>48</sup> This scenario starkly resembles what we have unveiled in the Cops8<sup>CKO</sup> mouse  
455 myocardium. Hence, in the future it will be interesting and important to test whether the  
456 impaired autophagic flux has exacerbated activation of the RIPK1-RIPK3 necroptotic pathway in  
457 Cop8<sup>CKO</sup> mice.

#### 458 **Sustained Nrf2 activation and reductive stress contribute to the CM necroptosis**

459 A surprising discovery of this study is that the sustained activation of Nrf2 in CMs promotes CM  
460 necroptosis and mouse premature death in the Cops8<sup>CKO</sup> mice. Our prior transcriptome analysis

461 has revealed a marked upregulation of Nrf2 target genes in Cops8<sup>CKO</sup> hearts at both 2 and 3  
462 weeks of age,<sup>43</sup> indicative of Nrf2 activation by Cops8 deficiency. The sustained activation of  
463 Nrf2 is reflected further by increases in both pS40-Nrf2 (an active form of Nrf2) and total Nrf2  
464 protein levels in Cops8<sup>CKO</sup> mouse hearts at both 2 and 3 weeks of age (**Figure 8A ~ 8C**) and by  
465 increased proteins and mRNA expression of BCL2 (**Figure 7D, 7E**), a known Nrf2 target gene.<sup>50</sup>  
466 Here the Nrf2 activation is probably triggered by increased oxidative stress resulting from  
467 impaired protein quality control (PQC) and is sustained by the defective inactivation of Nrf2. We  
468 have previously reported that Cops8 deficiency impairs the performance of both the UPS and the  
469 ALP, thereby impairing important cardiac PQC mechanisms.<sup>4, 7, 8</sup> Impaired PQC is known to  
470 increase oxidative stress;<sup>51</sup> indeed we detected increased myocardial levels of superoxide anions  
471 and protein carbonyls in mice with homozygous Cops8<sup>CKO</sup> (**Figure 5**), compelling evidence of  
472 increased oxidative stress. As suggested by increased myocardial protein levels of both pS40-  
473 Nrf2 and total Nrf2 in Cops8<sup>CKO</sup> mice at both 2 and 3 weeks of age (**Figure 8A~8C**), Cops8  
474 deficiency likely impairs Nrf2 degradation. This is because Nrf2 degradation is mediated by the  
475 UPS and the responsible ubiquitin ligases are KEAP1-Cul3-Rbx1 and  $\beta$ TrCP-Cul1-Rbx1, both  
476 belonging to the CRL family.<sup>52, 53</sup> Cullin deneddylation by the CSN requires all 8 COPS subunits  
477 to form the holocomplex and is essential to the proper functioning of all CRLs;<sup>54</sup> thus Cops8  
478 deficiency impairs the catalytic dynamics of CRLs and thereby impairs Nrf2 degradation. Taken  
479 together, both reduced myocardial caspase 8 activity and upregulated BCL2 in Cops8<sup>CKO</sup> mice  
480 can be explained by perturbation of cullin deneddylation by Cops8 deficiency and are likely  
481 responsible for suppression of the extrinsic and the intrinsic apoptosis pathways, respectively,  
482 allowing necroptosis to take place.

483 Previous reports have shown an important role of increased reactive oxygen species (ROS) in  
484 RIPK3-mediated necroptosis in cultured cells.<sup>38, 55</sup> In TNF $\alpha$  induced necroptosis, the RIPK3-  
485 centered necrosome increases ROS production through stimulating aerobic metabolism and  
486 RIPK3 does so probably by activating key enzymes of metabolic pathways including glycogen  
487 phosphorylase (PYGL), glutamate-ammonia ligase (GLUL), glutamate dehydrogenase 1  
488 (GLUD1),<sup>38</sup> and more recently pyruvate dehydrogenase (PDH) which is a rate-limiting enzyme  
489 linking glycolysis to aerobic respiration.<sup>56</sup> The increased ROS further promotes necrosome  
490 formation and yields cytotoxicity during necroptosis.<sup>55</sup> As reflected by increased DHE staining  
491 of superoxide and the elevated levels of protein carbonyls in Cops8<sup>CKO</sup> hearts (**Figure 5**),

492 increases in ROS or oxidative stress are indeed associated with CM necroptosis in Cops8<sup>CKO</sup>  
493 mice. Consistent with increased oxidative stress, Nrf2 and activated Nrf2, the master regulator of  
494 antioxidant and defensive responses, are markedly upregulated in Cops8<sup>CKO</sup> hearts even before  
495 CM necrosis becomes discernible (**Figure 8A ~ 8C**). However, administration of a ROS  
496 scavenger NAC or CM-restricted overexpression of HMOX1 failed to reduce CM necrosis; on  
497 the contrary, these measures markedly increased CM necrosis or exacerbated mouse premature  
498 death in Cops8<sup>CKO</sup> mice (**Figure 6**). Moreover, CM-restricted Nrf2 haploinsufficiency  
499 surprisingly delayed the premature death of Cops8<sup>CKO</sup> mice (**Figure 8D**). These findings from  
500 the present study provide compelling evidence that sustained Nrf2 activation and resultant  
501 reductive stress, rather than ROS *per se*, contribute to the induction of CM necroptosis by  
502 Cops8<sup>CKO</sup> in mice.

### 503 **Clinical implications**

504 The discoveries of the present study have significant clinical implications. For example, first of  
505 all, inadequate cardiac PQC due to UPS malfunction and ALP impairment has been implicated in  
506 the progression from a large subset of heart disease to heart failure;<sup>57, 58</sup> however, the  
507 mechanistic link between impaired PQC and heart failure has been obscure. The discoveries of  
508 the present study implicate that CM necroptosis could be one of the missing links, because  
509 cardiac PQC impairment is obviously the apical defect in Cops8<sup>CKO</sup> mice. Accordingly, targeting  
510 the necroptotic pathway could potentially help alleviate the adverse outcome of cardiac PQC  
511 impairment. Second, a small molecule CSN inhibitor (CSN5i) that inhibits the cullin  
512 deneddylation activity of the CSN by specifically targeting Cops5 has shown great promise in  
513 anti-tumor effects in experimental studies.<sup>18</sup> Hence, there is a good possibility for this compound  
514 to move into clinical trials for the treatment of cancer. CSN5i is expected to affect the  
515 degradation of a much smaller range of proteins than proteasome inhibitors would while being  
516 equally or even more effective in blocking cell cycle progression and causing cell death. The  
517 findings of the present study caution that cardiac function should be closely monitored should  
518 CSN5i or alike be moved into clinical trials. Lastly yet importantly, because of the wealth of  
519 accumulated evidence showing that Nrf2 is the major promotor of cellular defense against  
520 various pathological stresses in different organs, such as lungs, livers, kidneys, and the heart,  
521 Nrf2 has evolved to be an attractive drug target for the prevention or treatment of human diseases

522 including heart failure.<sup>59, 60</sup> However, a phase III clinical trial of bardoxolone methyl, an Nrf2  
523 inducer, for the treatment of chronic renal disease associated with diabetes was terminated due to  
524 significantly increased incidence of heart failure.<sup>61</sup> It is unclear whether the “dark” side of Nrf2  
525 is linked to the magnitude of Nrf2 activation<sup>62</sup> or simply due to off-target effects of the drug.  
526 Notably, a number of clinical trials at various phases on Nrf2 inducers for treating several other  
527 forms of disease (e.g., multiple sclerosis, cancers, pulmonary artery hypertension) are still  
528 ongoing; hence, elucidation of the mechanism governing the dark side of Nrf2 activation on the  
529 heart is absolutely warranted. To this end, the discovery of the present study that sustained Nrf2  
530 activation and reductive stress promote CM necroptosis in a heart with impaired functioning of  
531 autophagy and the UPS may provide a previously unsuspected mechanism for the adverse  
532 cardiac effect of Nrf2 inducers.

### 533 **Conclusions**

534 In conclusion, the present study has discovered that CM necrosis in Cops8<sup>CKO</sup> mice belongs to  
535 necroptosis; the activation of the RIPK1-RIPK3 pathway, sustained Nrf2 activation, and  
536 reductive stress but not MPT mediate the CM necroptosis. Since the key processes mediating the  
537 CM necroptosis here can be traced back to impaired functioning of CRLs, we demonstrate here  
538 that Cops8/the CSN by virtue of cullin deneddylation suppresses necroptosis and plays a crucial  
539 role in shaping the mode of regulated cell death. The emerging model for Cops8 deficiency to  
540 cause CM necroptosis is illustrated in **Figure 8E**. In brief, loss of cullin deneddylation resulting  
541 from Cops8<sup>CKO</sup> perturbs the catalytic dynamics of all CRLs, which in turn dysregulates the  
542 ubiquitination of a large subset of proteins and thereby impairs many cellular processes such as  
543 UPS-mediated protein degradation and autophagosome maturation, resulting in PQC  
544 impairment, increased proteotoxicity, and oxidative stress. As a result, CMs and possibly their  
545 non-CM neighbors increase the expression and secretion of TNF $\alpha$ . The autocrinal and paracrinal  
546 TNF $\alpha$  then bind TNFR1 on CMs and initiate TNFR1-mediated cell survival and/or death  
547 signaling. The survival signaling via NF $\kappa$ B activation is impaired because the ubiquitin-  
548 dependent degradation of I $\kappa$ B $\alpha$  is driven by a CRL type of E3 ligase (SCF <sup>$\beta$ TrCP</sup>) but the latter  
549 does not function properly due to Cops8 deficiency; consequently, the cell death pathways via  
550 formation of the RIPK1- or RIPK1-RIPK3- centered complex 2 become inevitable. Since  
551 caspase 8 activation and processing also requires Cul3-mediated polyubiquitination,<sup>16</sup> caspase 8

552 is disabled when cullin deneddylation is shut down; hence, the RIPK1-RIPK3 complex takes its  
553 course to necroptosis. Probably by upregulating anti-apoptotic factors such as BCL2 as well as  
554 causing reductive stress, sustained Nrf2 activation due to the impaired inactivation and  
555 degradation also helps steer the cell death mode to necroptosis, a more damaging form of cell  
556 death than apoptosis.

557

## 558 **References**

- 559 1. Lyapina S, Cope G, Shevchenko A, Serino G, Tsuge T, Zhou C, Wolf DA, Wei N and  
560 Deshaies RJ. Promotion of NEDD-CUL1 conjugate cleavage by COP9 signalosome. *Science*.  
561 2001;292:1382-5.
- 562 2. Lingaraju GM, Bunker RD, Cavadini S, Hess D, Hassiepen U, Renatus M, Fischer ES  
563 and Thoma NH. Crystal structure of the human COP9 signalosome. *Nature*. 2014;512:161-5.
- 564 3. Soucy TA, Smith PG, Milhollen MA, Berger AJ, Gavin JM, et al. An inhibitor of  
565 NEDD8-activating enzyme as a new approach to treat cancer. *Nature*. 2009;458:732-6.
- 566 4. Su H, Li J, Zhang H, Ma W, Wei N, Liu J and Wang X. COP9 Signalosome Controls the  
567 Degradation of Cytosolic Misfolded Proteins and Protects Against Cardiac Proteotoxicity. *Circ*  
568 *Res*. 2015.
- 569 5. Skaar JR, Pagan JK and Pagano M. Mechanisms and function of substrate recruitment by  
570 F-box proteins. *Nature reviews Molecular cell biology*. 2013;14:369-81.
- 571 6. Pierce NW, Lee JE, Liu X, Sweredoski MJ, Graham RL, Larimore EA, Rome M, Zheng  
572 N, Clurman BE, Hess S, Shan SO and Deshaies RJ. Cnd1 promotes assembly of new SCF  
573 complexes through dynamic exchange of F box proteins. *Cell*. 2013;153:206-15.
- 574 7. Su H, Li J, Menon S, Liu J, Kumarapeli AR, Wei N and Wang X. Perturbation of cullin  
575 deneddylation via conditional Csn8 ablation impairs the ubiquitin-proteasome system and causes  
576 cardiomyocyte necrosis and dilated cardiomyopathy in mice. *Circ Res*. 2011;108:40-50.
- 577 8. Su H, Li F, Ranek MJ, Wei N and Wang X. COP9 signalosome regulates autophagosome  
578 maturation. *Circulation*. 2011;124:2117-28.
- 579 9. Su H, Li J, Osinska H, Li F, Robbins J, Liu J, Wei N and Wang X. The COP9  
580 signalosome is required for autophagy, proteasome-mediated proteolysis, and cardiomyocyte  
581 survival in adult mice. *Circulation Heart failure*. 2013;6:1049-57.
- 582 10. Choi ME, Price DR, Ryter SW and Choi AMK. Necroptosis: a crucial pathogenic  
583 mediator of human disease. *JCI Insight*. 2019;4.
- 584 11. Del Re DP, Amgalan D, Linkermann A, Liu Q and Kitsis RN. Fundamental Mechanisms  
585 of Regulated Cell Death and Implications for Heart Disease. *Physiological reviews*.  
586 2019;99:1765-1817.
- 587 12. Zhang X, Zhang H, Xu C, Li X, Li M, Wu X, Pu W, Zhou B, Wang H, Li D, Ding Q,  
588 Ying H, Wang H and Zhang H. Ubiquitination of RIPK1 suppresses programmed cell death by

- 589 regulating RIPK1 kinase activation during embryogenesis. *Nature communications*.  
590 2019;10:4158.
- 591 13. Tang Y, Tu H, Zhang J, Zhao X, Wang Y, Qin J and Lin X. K63-linked ubiquitination  
592 regulates RIPK1 kinase activity to prevent cell death during embryogenesis and inflammation.  
593 *Nature communications*. 2019;10:4157.
- 594 14. Newton K, Matsumoto ML, Wertz IE, Kirkpatrick DS, Lill JR, Tan J, Dugger D, Gordon  
595 N, Sidhu SS, Fellouse FA, Komuves L, French DM, Ferrando RE, Lam C, Compaan D, Yu C,  
596 Bosanac I, Hymowitz SG, Kelley RF and Dixit VM. Ubiquitin chain editing revealed by  
597 polyubiquitin linkage-specific antibodies. *Cell*. 2008;134:668-78.
- 598 15. Wertz IE, O'Rourke KM, Zhou H, Eby M, Aravind L, Seshagiri S, Wu P, Wiesmann C,  
599 Baker R, Boone DL, Ma A, Koonin EV and Dixit VM. De-ubiquitination and ubiquitin ligase  
600 domains of A20 downregulate NF-kappaB signalling. *Nature*. 2004;430:694-9.
- 601 16. Jin Z, Li Y, Pitti R, Lawrence D, Pham VC, Lill JR and Ashkenazi A. Cullin3-based  
602 polyubiquitination and p62-dependent aggregation of caspase-8 mediate extrinsic apoptosis  
603 signaling. *Cell*. 2009;137:721-35.
- 604 17. Tomoda K, Yoneda-Kato N, Fukumoto A, Yamanaka S and Kato JY. Multiple functions  
605 of Jab1 are required for early embryonic development and growth potential in mice. *The Journal*  
606 *of biological chemistry*. 2004;279:43013-8.
- 607 18. Schlierf A, Altmann E, Quancard J, Jefferson AB, Assenberg R, Renatus M, Jones M,  
608 Hassiepen U, Schaefer M, Kiffe M, Weiss A, Wiesmann C, Sedrani R, Eder J and Martoglio B.  
609 Targeted inhibition of the COP9 signalosome for treatment of cancer. *Nature communications*.  
610 2016;7:13166.
- 611 19. Whelan RS, Kaplinskiy V and Kitsis RN. Cell death in the pathogenesis of heart disease:  
612 mechanisms and significance. *Annu Rev Physiol*. 2010;72:19-44.
- 613 20. Szobi A, Goncalvesova E, Varga ZV, Leszek P, Kusmierczyk M, Hulman M, Kyselovic  
614 J, Ferdinandy P and Adameova A. Analysis of necroptotic proteins in failing human hearts. *J*  
615 *Transl Med*. 2017;15:86.
- 616 21. Hu D, Huang J, Hu S, Zhang Y, Li S, Sun Y, Li C, Cui G and Wang DW. A common  
617 variant of RIP3 promoter region is associated with poor prognosis in heart failure patients by  
618 influencing SOX17 binding. *Journal of cellular and molecular medicine*. 2019;23:5317-5328.
- 619 22. Luedde M, Lutz M, Carter N, Sosna J, Jacoby C, Vucur M, Gautheron J, Roderburg C,

- 620 Borg N, Reisinger F, Hippe HJ, Linkermann A, Wolf MJ, Rose-John S, Lullmann-Rauch R,  
621 Adam D, Fogel U, Heikenwalder M, Luedde T and Frey N. RIP3, a kinase promoting  
622 necroptotic cell death, mediates adverse remodelling after myocardial infarction. *Cardiovascular*  
623 *research*. 2014;103:206-16.
- 624 23. Zhang T, Zhang Y, Cui M, Jin L, Wang Y, Lv F, Liu Y, Zheng W, Shang H, Zhang J,  
625 Zhang M, Wu H, Guo J, Zhang X, Hu X, Cao CM and Xiao RP. CaMKII is a RIP3 substrate  
626 mediating ischemia- and oxidative stress-induced myocardial necroptosis. *Nat Med*.  
627 2016;22:175-82.
- 628 24. Yang Z, Li C, Wang Y, Yang J, Yin Y, Liu M, Shi Z, Mu N, Yu L and Ma H. Melatonin  
629 attenuates chronic pain related myocardial ischemic susceptibility through inhibiting RIP3-  
630 MLKL/CaMKII dependent necroptosis. *J Mol Cell Cardiol*. 2018;125:185-194.
- 631 25. Zhang L, Feng Q and Wang T. Necrostatin-1 Protects Against Paraquat-Induced Cardiac  
632 Contractile Dysfunction via RIP1-RIP3-MLKL-Dependent Necroptosis Pathway. *Cardiovasc*  
633 *Toxicol*. 2018;18:346-355.
- 634 26. Qin D, Wang X, Li Y, Yang L, Wang R, Peng J, Essandoh K, Mu X, Peng T, Han Q, Yu  
635 KJ and Fan GC. MicroRNA-223-5p and -3p Cooperatively Suppress Necroptosis in  
636 Ischemic/Reperfused Hearts. *The Journal of biological chemistry*. 2016;291:20247-59.
- 637 27. Guo X, Yin H, Li L, Chen Y, Li J, Doan J, Steinmetz R and Liu Q. Cardioprotective Role  
638 of Tumor Necrosis Factor Receptor-Associated Factor 2 by Suppressing Apoptosis and  
639 Necroptosis. *Circulation*. 2017;136:729-742.
- 640 28. Li L, Chen Y, Doan J, Murray J, Molkenin JD and Liu Q. Transforming growth factor  
641 beta-activated kinase 1 signaling pathway critically regulates myocardial survival and  
642 remodeling. *Circulation*. 2014;130:2162-72.
- 643 29. Newton K, Sun X and Dixit VM. Kinase RIP3 is dispensable for normal NF-kappa Bs,  
644 signaling by the B-cell and T-cell receptors, tumor necrosis factor receptor 1, and Toll-like  
645 receptors 2 and 4. *Molecular and cellular biology*. 2004;24:1464-9.
- 646 30. Baines CP, Kaiser RA, Purcell NH, Blair NS, Osinska H, Hambleton MA, Brunskill EW,  
647 Sayen MR, Gottlieb RA, Dorn GW, Robbins J and Molkenin JD. Loss of cyclophilin D reveals  
648 a critical role for mitochondrial permeability transition in cell death. *Nature*. 2005;434:658-62.
- 649 31. Okabe M, Ikawa M, Kominami K, Nakanishi T and Nishimune Y. 'Green mice' as a  
650 source of ubiquitous green cells. *FEBS Lett*. 1997;407:313-9.



- 651 32. Wojtala A, Bonora M, Malinska D, Pinton P, Duszynski J and Wieckowski MR. Methods  
652 to monitor ROS production by fluorescence microscopy and fluorometry. *Methods Enzymol.*  
653 2014;542:243-62.
- 654 33. Pan B, Zhang H, Cui T and Wang X. TFEB activation protects against cardiac  
655 proteotoxicity via increasing autophagic flux. *J Mol Cell Cardiol.* 2017;113:51-62.
- 656 34. Gilda JE and Gomes AV. Western blotting using in-gel protein labeling as a  
657 normalization control: stain-free technology. *Methods Mol Biol.* 2015;1295:381-91.
- 658 35. Hu C, Tian Y, Xu H, Pan B, Terpstra EM, Wu P, Wang H, Li F, Liu J and Wang X.  
659 Inadequate ubiquitination-proteasome coupling contributes to myocardial ischemia-reperfusion  
660 injury. *The Journal of clinical investigation.* 2018;128:5294-5306.
- 661 36. Li J, Powell SR and Wang X. Enhancement of proteasome function by PA28 $\alpha$ ;  
662 overexpression protects against oxidative stress. *FASEB J.* 2011;25:883-93.
- 663 37. Li J, McQuade T, Siemer AB, Napetschnig J, Moriwaki K, Hsiao YS, Damko E, Moquin  
664 D, Walz T, McDermott A, Chan FK and Wu H. The RIP1/RIP3 necrosome forms a functional  
665 amyloid signaling complex required for programmed necrosis. *Cell.* 2012;150:339-50.
- 666 38. Zhang DW, Shao J, Lin J, Zhang N, Lu BJ, Lin SC, Dong MQ and Han J. RIP3, an  
667 energy metabolism regulator that switches TNF-induced cell death from apoptosis to necrosis.  
668 *Science.* 2009;325:332-6.
- 669 39. Cho YS, Challa S, Moquin D, Genga R, Ray TD, Guildford M and Chan FK.  
670 Phosphorylation-driven assembly of the RIP1-RIP3 complex regulates programmed necrosis and  
671 virus-induced inflammation. *Cell.* 2009;137:1112-23.
- 672 40. Degtarev A, Hitomi J, Gemscheid M, Ch'en IL, Korkina O, Teng X, Abbott D, Cuny  
673 GD, Yuan C, Wagner G, Hedrick SM, Gerber SA, Lugovskoy A and Yuan J. Identification of  
674 RIP1 kinase as a specific cellular target of necrostatins. *Nature chemical biology.* 2008;4:313-21.
- 675 41. Galluzzi L, Vitale I, Aaronson SA, Abrams JM, Adam D, et al. Molecular mechanisms of  
676 cell death: recommendations of the Nomenclature Committee on Cell Death 2018. *Cell death*  
677 *and differentiation.* 2018;25:486-541.
- 678 42. Lim SY, Davidson SM, Mocanu MM, Yellon DM and Smith CC. The cardioprotective  
679 effect of necrostatin requires the cyclophilin-D component of the mitochondrial permeability  
680 transition pore. *Cardiovascular drugs and therapy / sponsored by the International Society of*  
681 *Cardiovascular Pharmacotherapy.* 2007;21:467-9.

- 682 43. Abdullah A, Eyster KM, Bjordahl T, Xiao P, Zeng E and Wang X. Murine Myocardial  
683 Transcriptome Analysis Reveals a Critical Role of COPS8 in the Gene Expression of Cullin-  
684 RING Ligase Substrate Receptors and Redox and Vesicle Trafficking Pathways. *Frontiers in*  
685 *physiology*. 2017;8:594.
- 686 44. Huang HC, Nguyen T and Pickett CB. Phosphorylation of Nrf2 at Ser-40 by protein  
687 kinase C regulates antioxidant response element-mediated transcription. *The Journal of*  
688 *biological chemistry*. 2002;277:42769-74.
- 689 45. He S, Wang L, Miao L, Wang T, Du F, Zhao L and Wang X. Receptor interacting protein  
690 kinase-3 determines cellular necrotic response to TNF-alpha. *Cell*. 2009;137:1100-11.
- 691 46. Mishra PK, Adameova A, Hill JA, Baines CP, Kang PM, Downey JM, Narula J,  
692 Takahashi M, Abbate A, Pristine HC, Kar S, Su S, Higa JK, Kawasaki NK and Matsui T.  
693 Guidelines for evaluating myocardial cell death. *American journal of physiology Heart and*  
694 *circulatory physiology*. 2019;317:H891-H922.
- 695 47. Kanarek N and Ben-Neriah Y. Regulation of NF-kappaB by ubiquitination and  
696 degradation of the IkappaBs. *Immunol Rev*. 2012;246:77-94.
- 697 48. Ogasawara M, Yano T, Tanno M, Abe K, Ishikawa S, Miki T, Kuno A, Tobisawa T,  
698 Muratsubaki S, Ohno K, Tatekoshi Y, Nakata K, Ohwada W and Miura T. Suppression of  
699 autophagic flux contributes to cardiomyocyte death by activation of necroptotic pathways. *J Mol*  
700 *Cell Cardiol*. 2017;108:203-213.
- 701 49. Abe K, Yano T, Tanno M, Miki T, Kuno A, Sato T, Kouzu H, Nakata K, Ohwada W,  
702 Kimura Y, Sugawara H, Shibata S, Igaki Y, Ino S and Miura T. mTORC1 inhibition attenuates  
703 necroptosis through RIP1 inhibition-mediated TFEB activation. *Biochim Biophys Acta Mol Basis*  
704 *Dis*. 2019;1865:165552.
- 705 50. Niture SK and Jaiswal AK. Nrf2 protein up-regulates antiapoptotic protein Bcl-2 and  
706 prevents cellular apoptosis. *The Journal of biological chemistry*. 2012;287:9873-86.
- 707 51. Paniagua Soriano G, De Bruin G, Overkleeft HS and Florea BI. Toward understanding  
708 induction of oxidative stress and apoptosis by proteasome inhibitors. *Antioxid Redox Signal*.  
709 2014;21:2419-43.
- 710 52. Kobayashi A, Kang MI, Okawa H, Ohtsuji M, Zenke Y, Chiba T, Igarashi K and  
711 Yamamoto M. Oxidative stress sensor Keap1 functions as an adaptor for Cul3-based E3 ligase to  
712 regulate proteasomal degradation of Nrf2. *Molecular and cellular biology*. 2004;24:7130-9.

- 713 53. Rada P, Rojo AI, Chowdhry S, McMahon M, Hayes JD and Cuadrado A. SCF/ $\beta$ -  
714 TrCP promotes glycogen synthase kinase 3-dependent degradation of the Nrf2 transcription  
715 factor in a Keap1-independent manner. *Molecular and cellular biology*. 2011;31:1121-33.
- 716 54. Cavadini S, Fischer ES, Bunker RD, Potenza A, Lingaraju GM, Goldie KN, Mohamed  
717 WI, Faty M, Petzold G, Beckwith RE, Tichkule RB, Hassiepen U, Abdulrahman W, Pantelic RS,  
718 Matsumoto S, Sugasawa K, Stahlberg H and Thoma NH. Cullin-RING ubiquitin E3 ligase  
719 regulation by the COP9 signalosome. *Nature*. 2016;531:598-603.
- 720 55. Schenk B and Fulda S. Reactive oxygen species regulate Smac mimetic/TNF $\alpha$ -  
721 induced necroptotic signaling and cell death. *Oncogene*. 2015;34:5796-806.
- 722 56. Yang Z, Wang Y, Zhang Y, He X, Zhong CQ, Ni H, Chen X, Liang Y, Wu J, Zhao S,  
723 Zhou D and Han J. RIP3 targets pyruvate dehydrogenase complex to increase aerobic respiration  
724 in TNF-induced necroptosis. *Nature cell biology*. 2018;20:186-197.
- 725 57. Wang X and Cui T. Autophagy modulation: a potential therapeutic approach in cardiac  
726 hypertrophy. *American journal of physiology Heart and circulatory physiology*. 2017;313:H304-  
727 H319.
- 728 58. Wang X and Robbins J. Proteasomal and lysosomal protein degradation and heart  
729 disease. *J Mol Cell Cardiol*. 2014;71:16-24.
- 730 59. Li J, Ichikawa T, Janicki JS and Cui T. Targeting the Nrf2 pathway against  
731 cardiovascular disease. *Expert Opin Ther Targets*. 2009;13:785-94.
- 732 60. Suzuki T, Motohashi H and Yamamoto M. Toward clinical application of the Keap1-  
733 Nrf2 pathway. *Trends Pharmacol Sci*. 2013;34:340-6.
- 734 61. de Zeeuw D, Akizawa T, Audhya P, Bakris GL, Chin M, Christ-Schmidt H, Goldsberry  
735 A, Houser M, Krauth M, Lambers Heerspink HJ, McMurray JJ, Meyer CJ, Parving HH,  
736 Remuzzi G, Toto RD, Vaziri ND, Wanner C, Wittes J, Wroldstad D, Chertow GM and  
737 Investigators BT. Bardoxolone methyl in type 2 diabetes and stage 4 chronic kidney disease. *N*  
738 *Engl J Med*. 2013;369:2492-503.
- 739 62. Maher J and Yamamoto M. The rise of antioxidant signaling--the evolution and hormetic  
740 actions of Nrf2. *Toxicol Appl Pharmacol*. 2010;244:4-15.

741

742

743 **Figures and Figure legends**

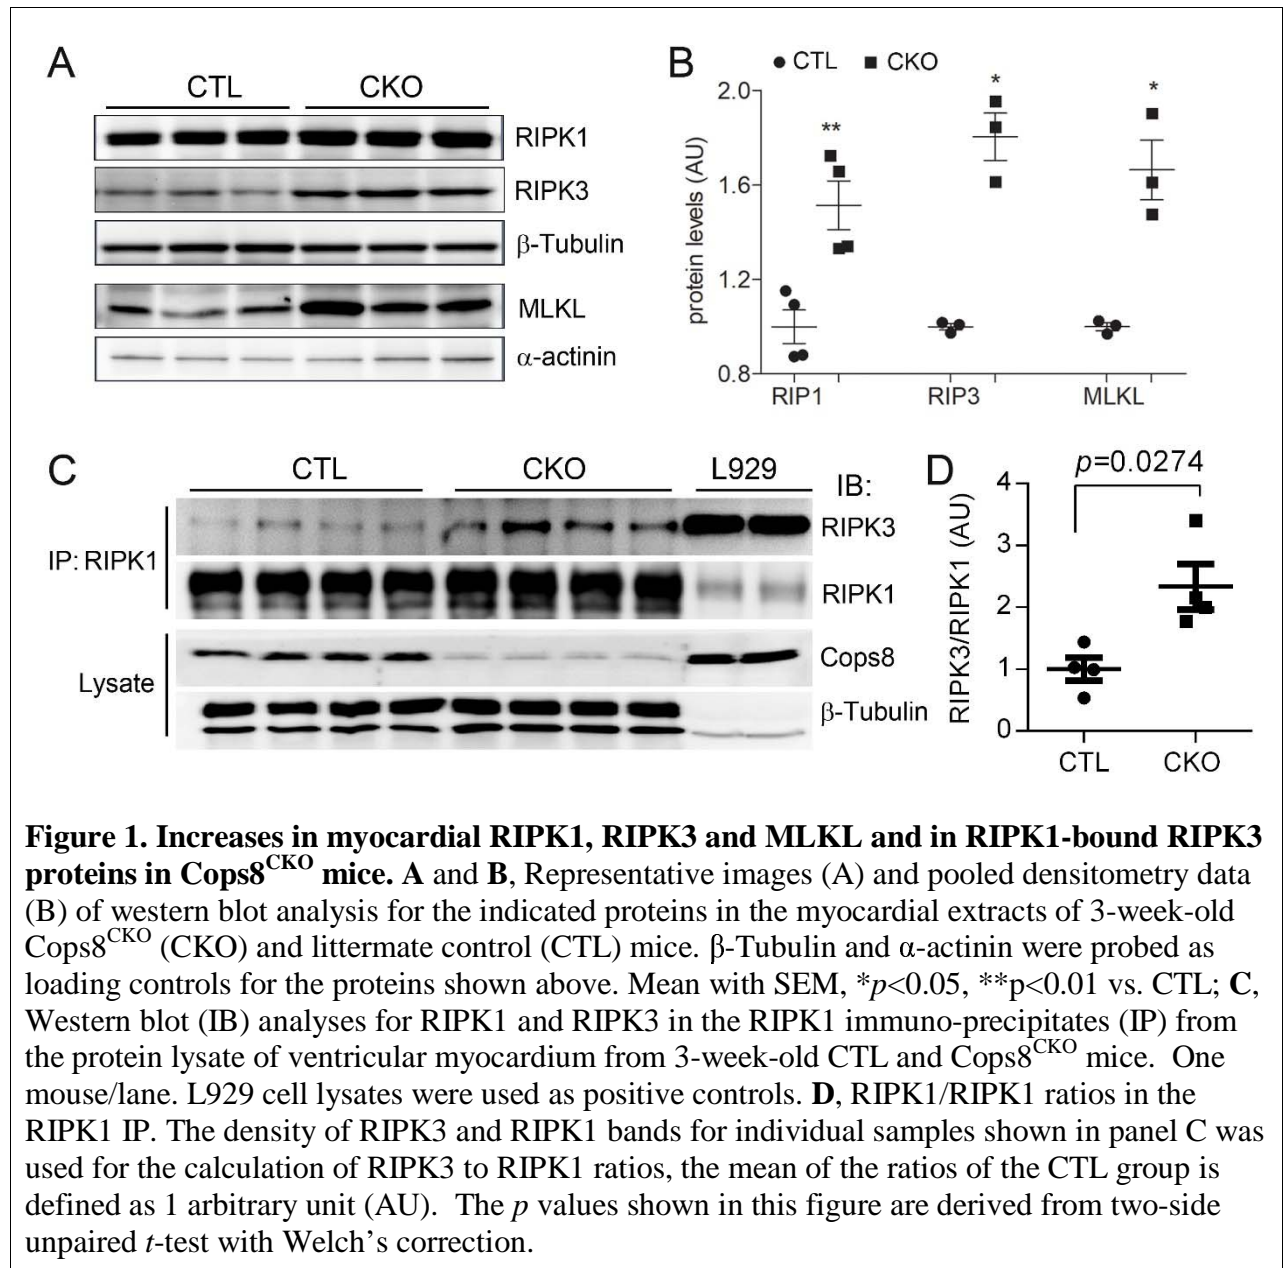

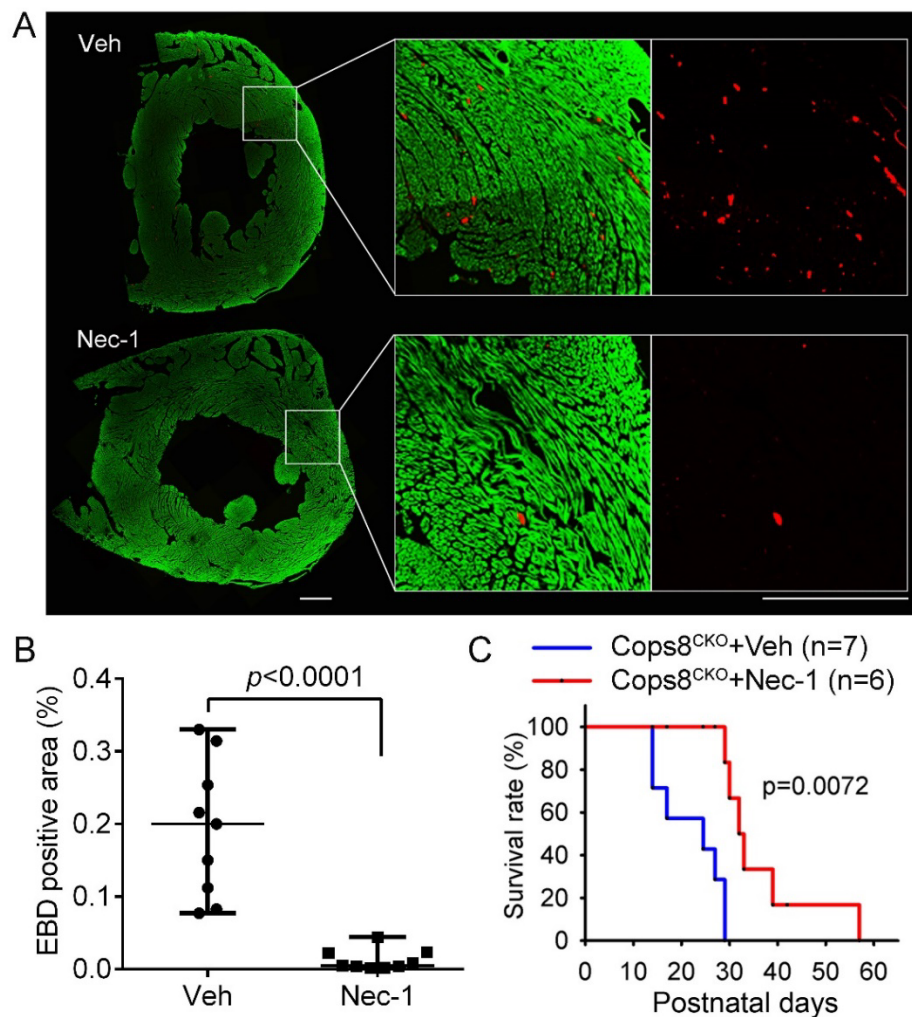

**Figure 2. Necrostatin-1 (Nec-1) treatment markedly reduces CM necrosis and delays premature death of Cops8<sup>CKO</sup> mice.** Cohorts of Cops8<sup>CKO</sup> mice at 2 weeks of age were treated with necrostatin-1 (Nec-1, 1.56 mg/kg/day) or vehicle (Veh) via intraperitoneal osmotic mini-pumps for 1 week (**A**, **B**) or continued for >2 weeks for the Kaplan-Meier survival analysis (**C**). **A** and **B**, At day 6, after min-pump implantation, mice were treated with one dose of Evan's blue dye (EBD; 100 mg/kg, i.p.) 18 hours before they were anesthetized and perfusion-fixed in situ. Cryosections from the fixed heart were stained with Alexa488-conjugated phalloidin to identify CMs (green) and subjected to fluorescence confocal imaging analyses. The images of each ventricular tissue ring were reconstructed and used for quantification of EBD-positive area (red) and total green area. Panel **A** shows representative reconstructed images from a pair of Cops8<sup>CKO</sup> hearts treated with Veh or Nec-1; scale bar=0.5 mm. Individual percent values of average EBD positive area in the 3 representative sections/mouse from 3 mice of each group are plotted in panel **B**, superimposed by median with range; Mann Whitney test. **C**, Kaplan-Meier survival curve of Cops8<sup>CKO</sup> mice treated with Veh or Nec-1. Nec-1 treatment significantly increased lifespan of Cops8<sup>CKO</sup> mice compared with the vehicle-treated group (median lifespan: 32.5 vs. 27 days); Log-rank Test.

745

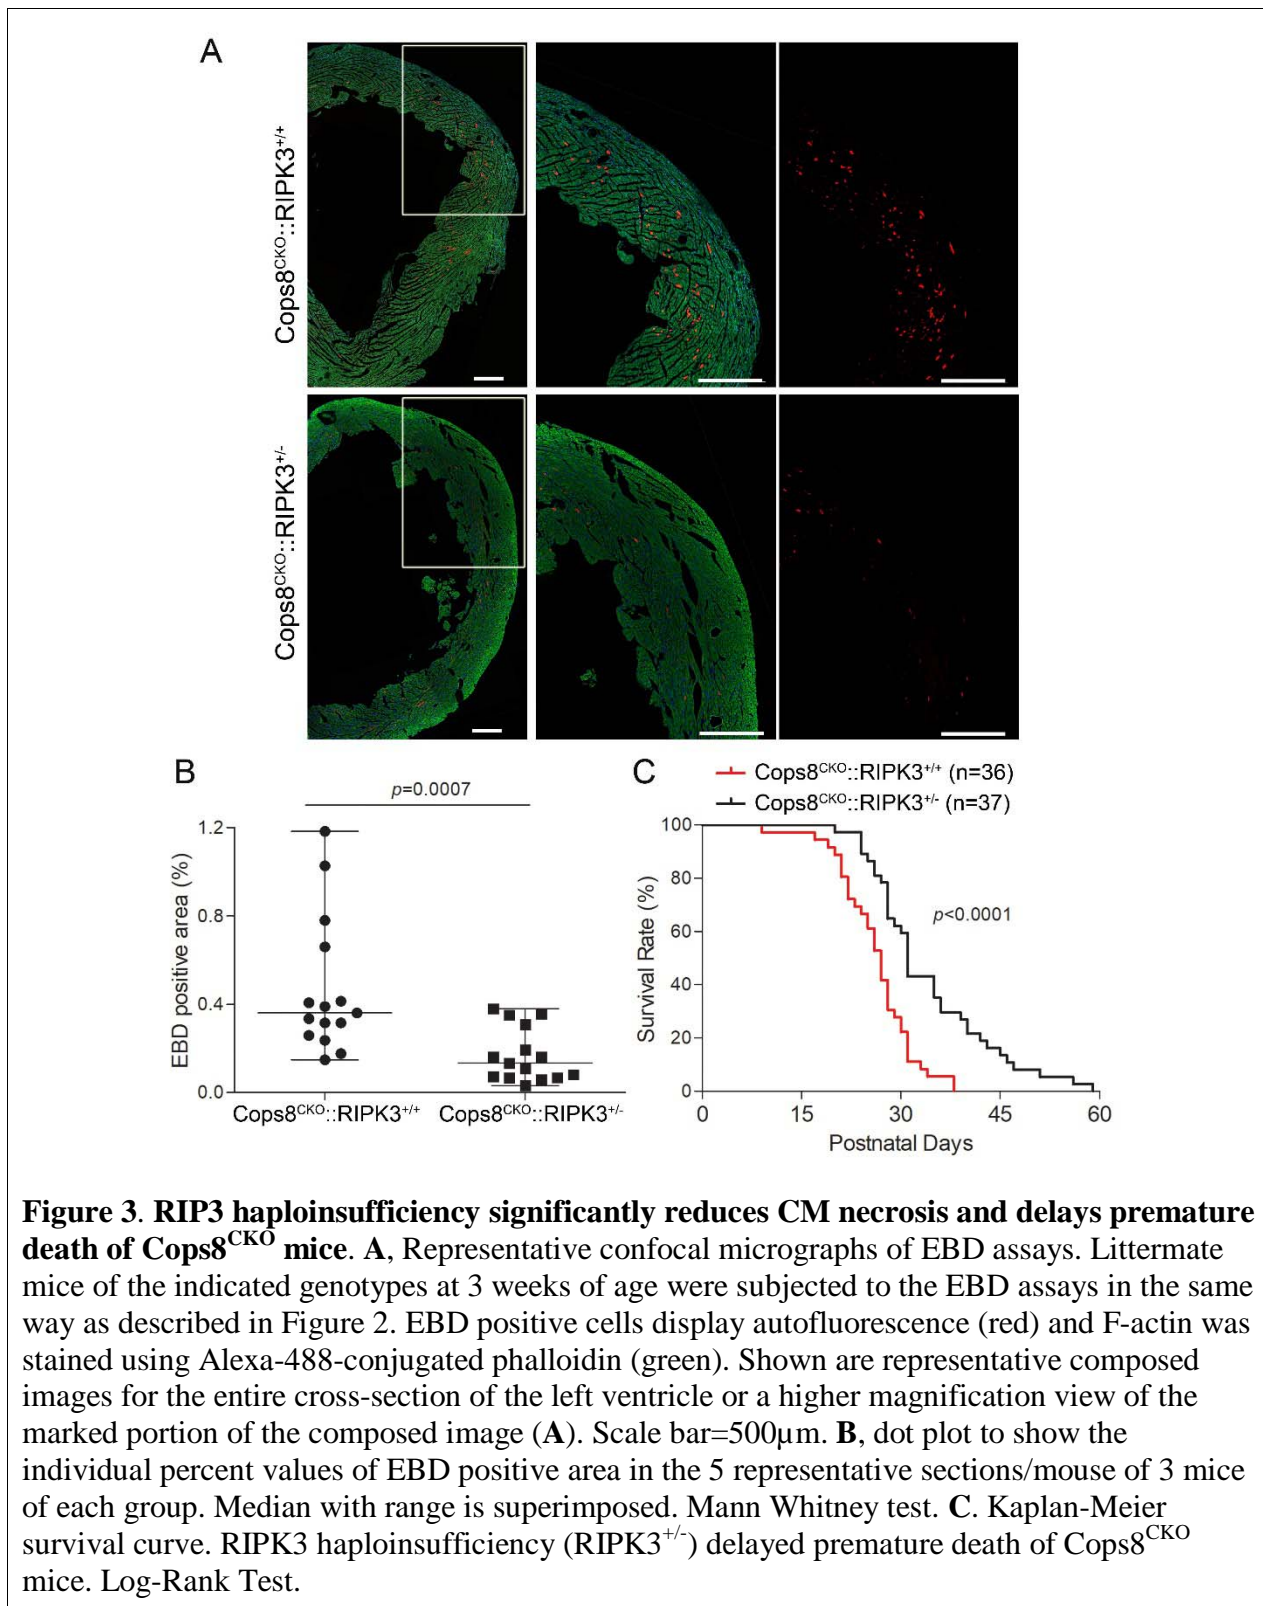

746

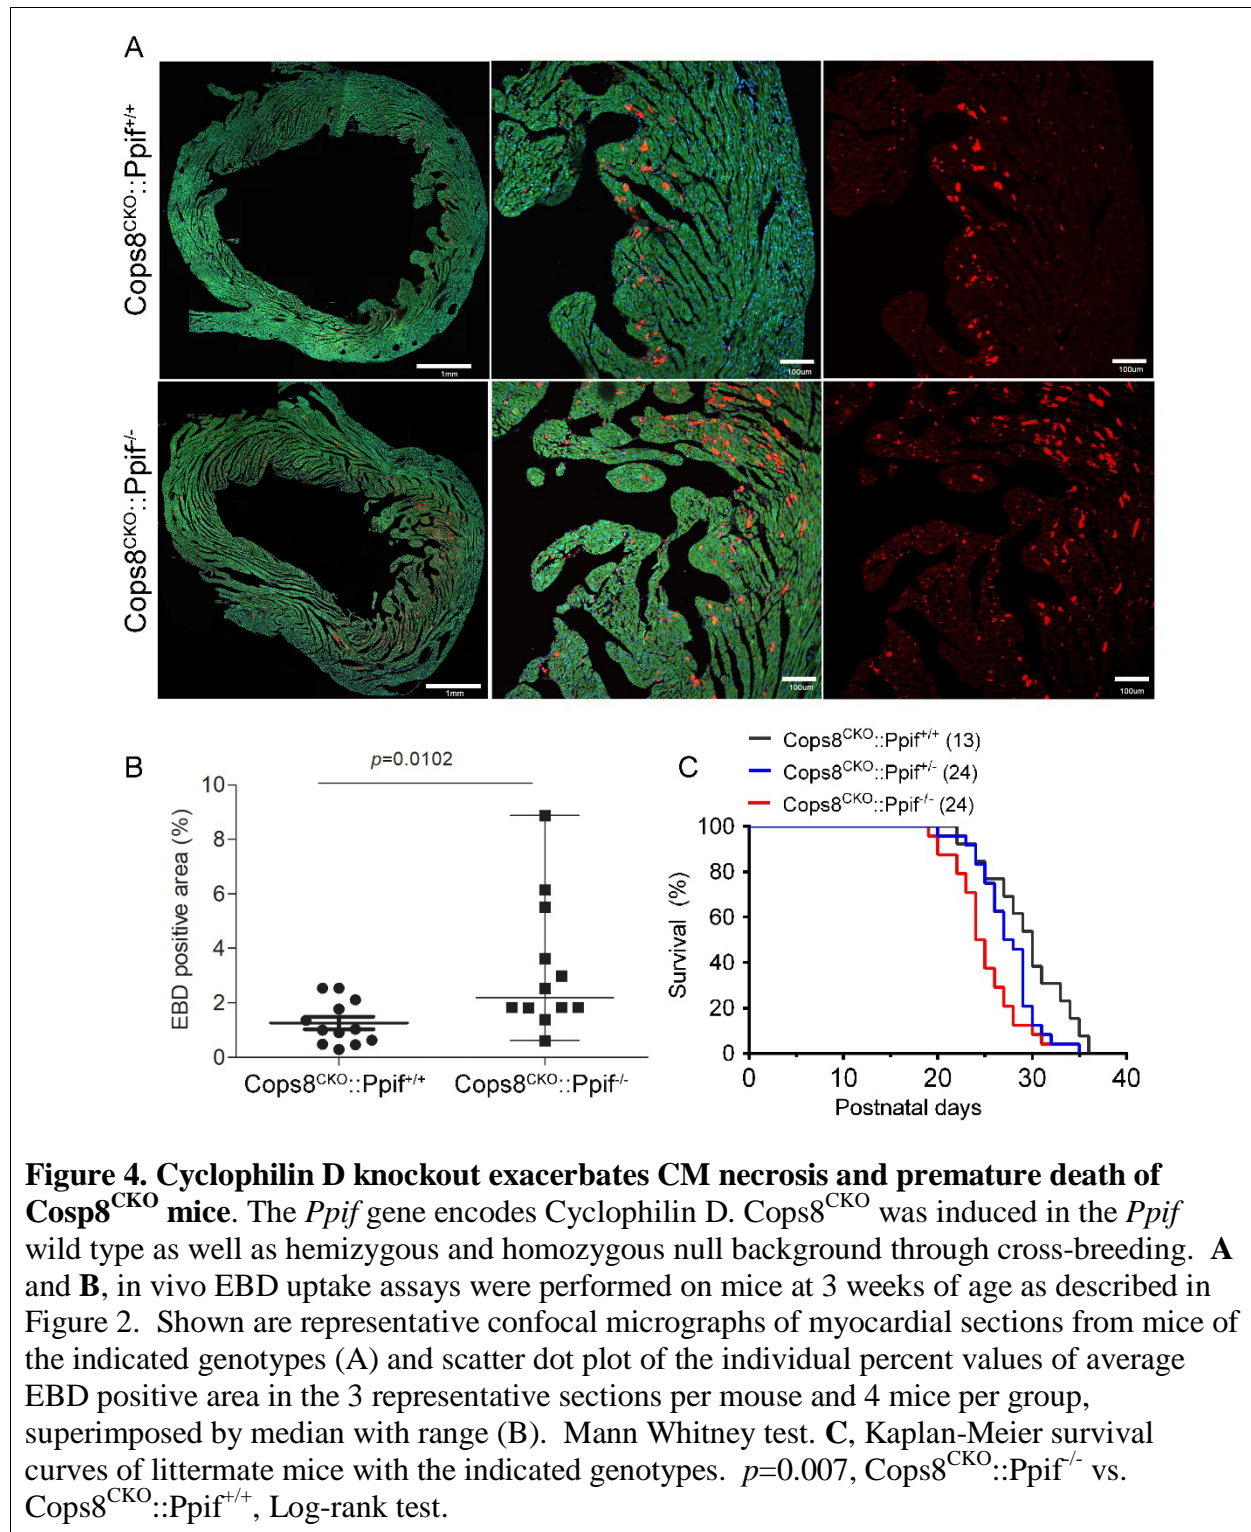

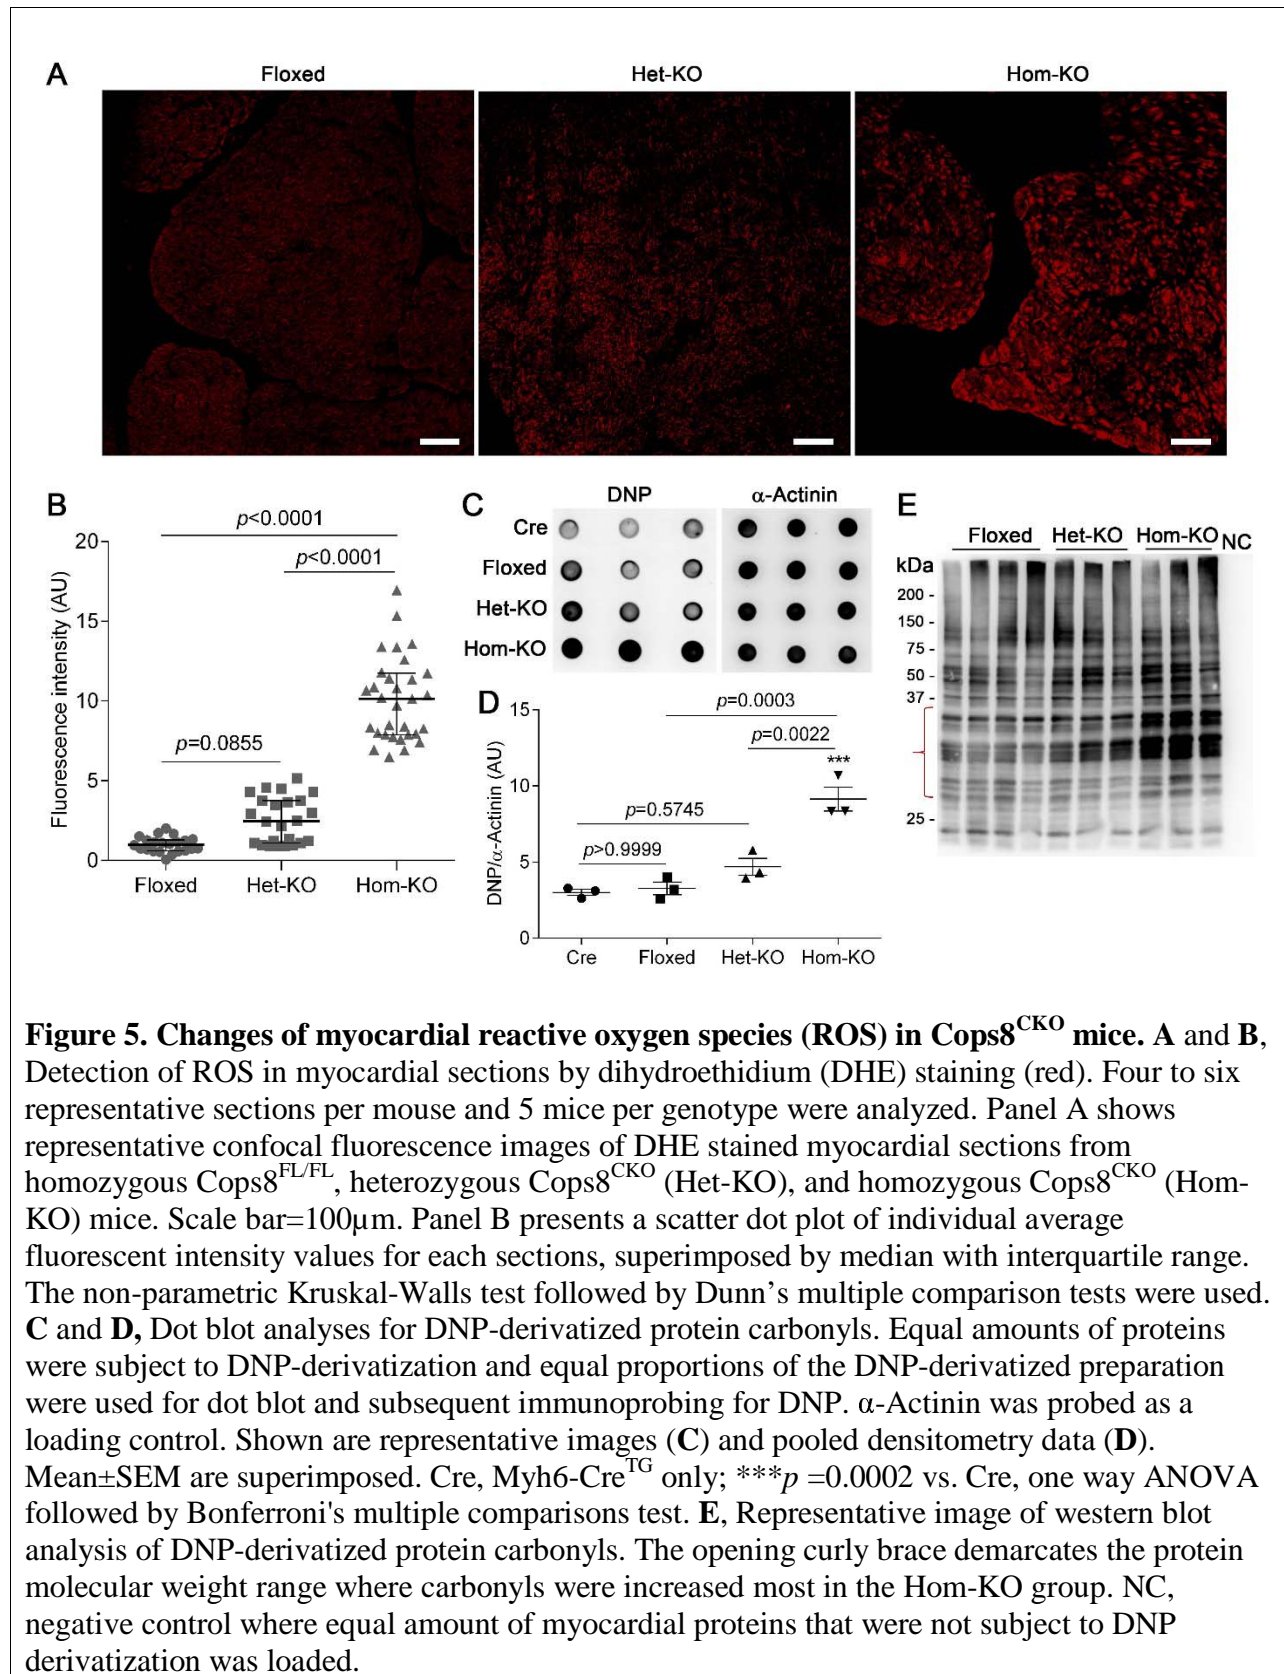



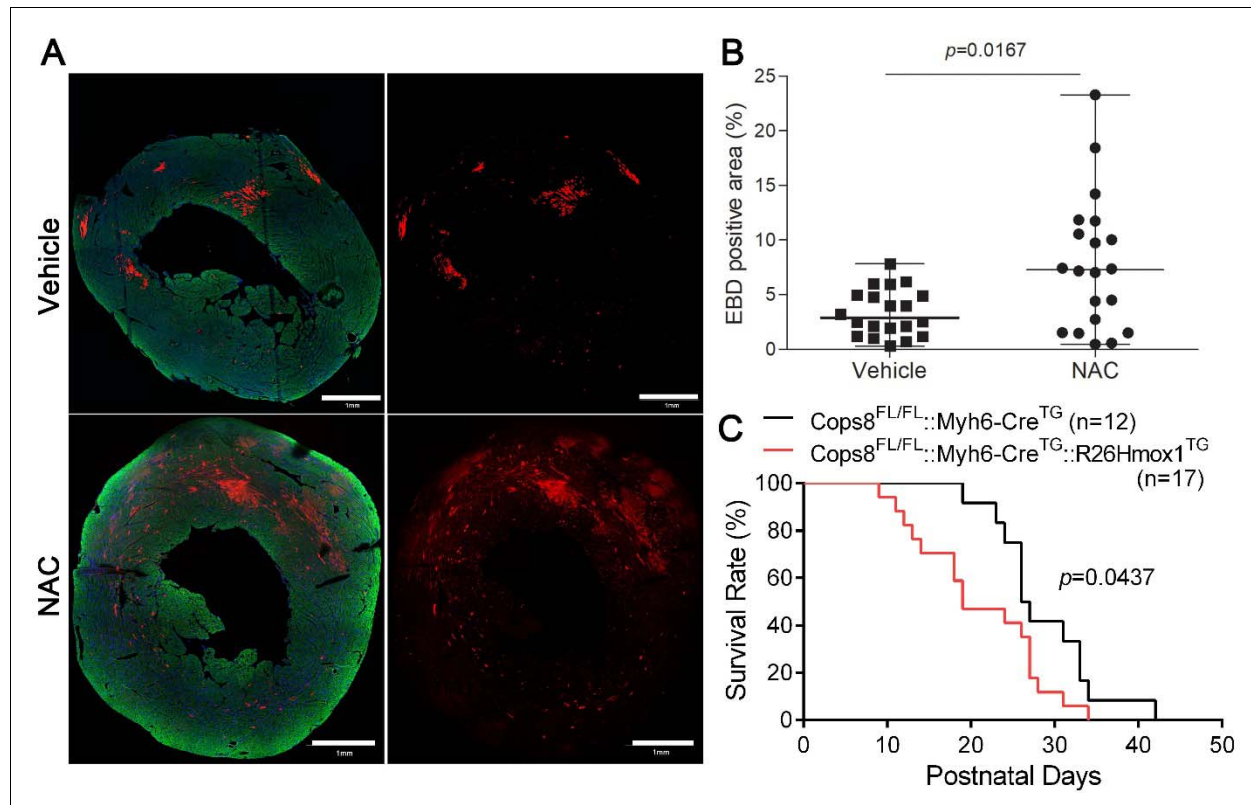

**Figure 6. NAC treatment and Hmx1 overexpression exacerbates CM necrosis and premature death in  $Cops8^{CKO}$  mice.** **A** and **B**, Representative composed confocal images (**A**) and pooled quantitative data (**B**) from the EBD uptake assays for LV myocardium of  $Cops8^{CKO}$  mice treated with NAC or vehicle control. Seven consecutive daily intraperitoneal injections of NAC (100 mg/kg/day) or vehicle were initiated at 14 days of age. EBD assays were performed at 21 days of age as described in Figure 2. EBD positive CMs emit auto-fluorescence (red); Alexa fluor-488-conjugated phalloidin was used to stain F-actin and thereby identify cardiomyocytes (green). In the dot plot (**B**), individual percent values of average EBD positive area are shown. Four representative sections/mouse and 5 mice/group were included. Median with range,  $p=0.0167$ , Mann Whitney test. **C**, Kaplan-Meier survival curve of mice of the indicated genotypes. Both males and females (roughly 1:1 ratio) were included. Log-rank test.

749

750

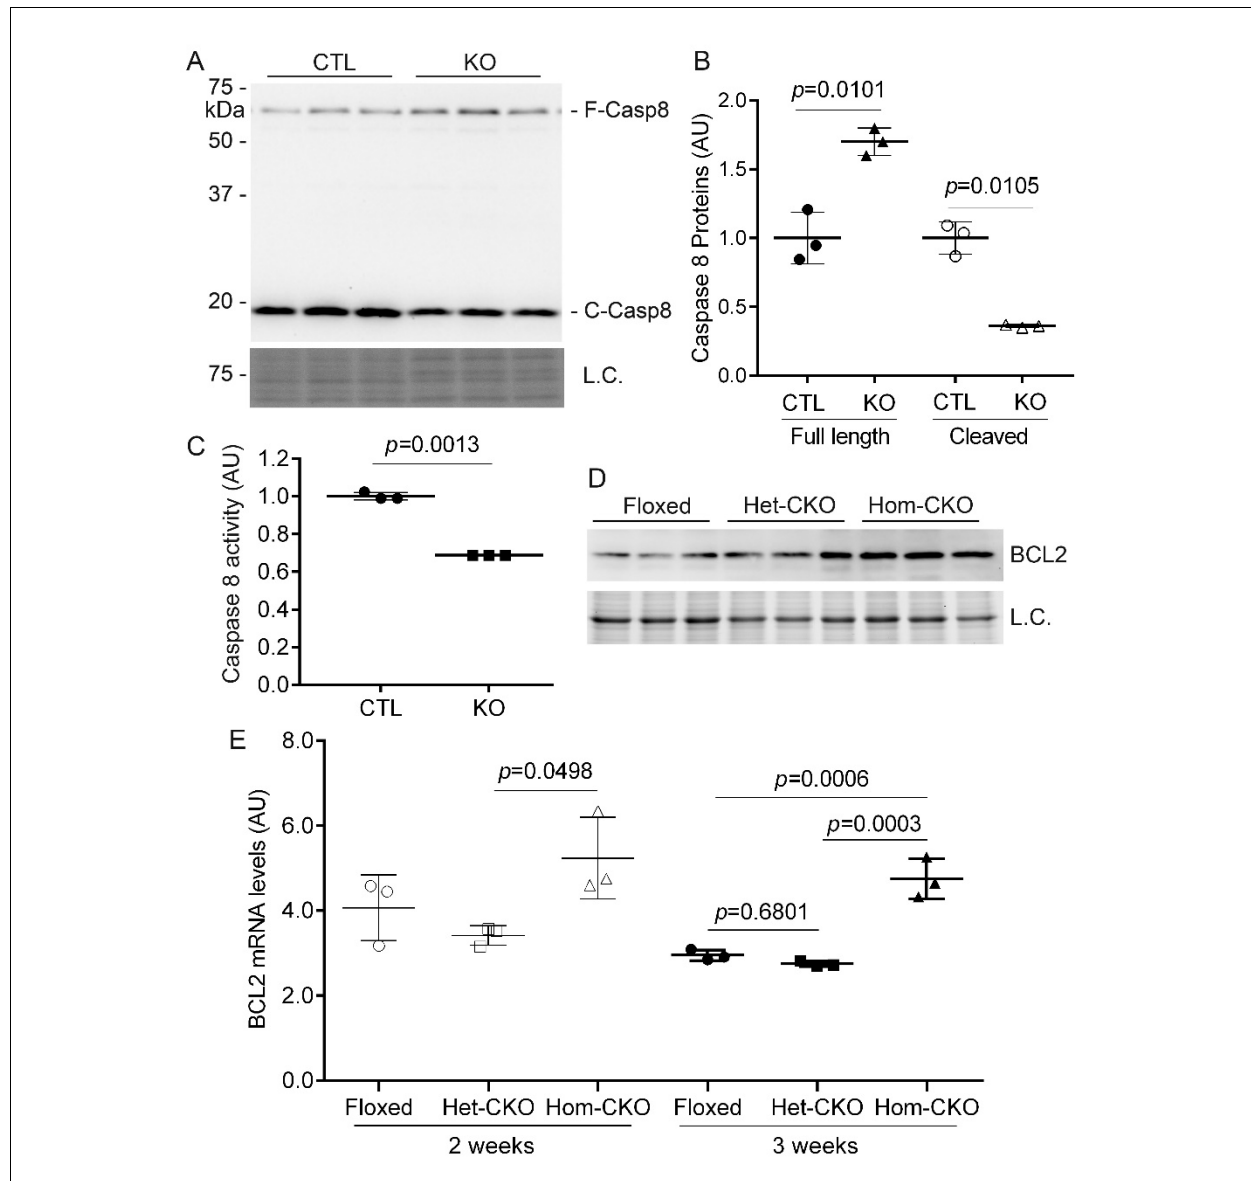

**Figure 7. Changes in both protein expression and activities of caspases 8 as well as BCL2 protein and mRNA levels in *Cops8*<sup>CKO</sup> mouse hearts.** **A** and **B**, Representative images (A) and scatter dot plots of pooled densitometry data (B) of western blot analyses for caspase 8 (Casp8). L.C., Loading control which is a portion of the image from stain-free in-gel imaging of total proteins that was used to normalize caspase 8 western blot signals. F-, full length; C-, cleaved form. **C**, Changes in myocardial caspase 8 activities in *Cops8*<sup>CKO</sup> mice at 3 weeks. CTL, littermate control; KO, homozygous *Cops8*<sup>CKO</sup>. **D**, Representative images of western blot analyses for myocardial BCL2 in homozygous *Cops8*<sup>FL/FL</sup> (Floxed), heterozygous *Cops8*<sup>CKO</sup> (Het-CKO), and homozygous *Cops8*<sup>CKO</sup> (Hom-CKO) mice at 3 weeks of age. **E**, Changes in myocardial BCL2 mRNA levels in mice at 2 and 3 weeks of age. Each scatter dot plot is superimposed by mean±SD; each dot represents a mouse; *p* values are derived from unpaired t-tests with Welch's correction (B, C) or one way ANOVA followed by Tukey's test (E).

751

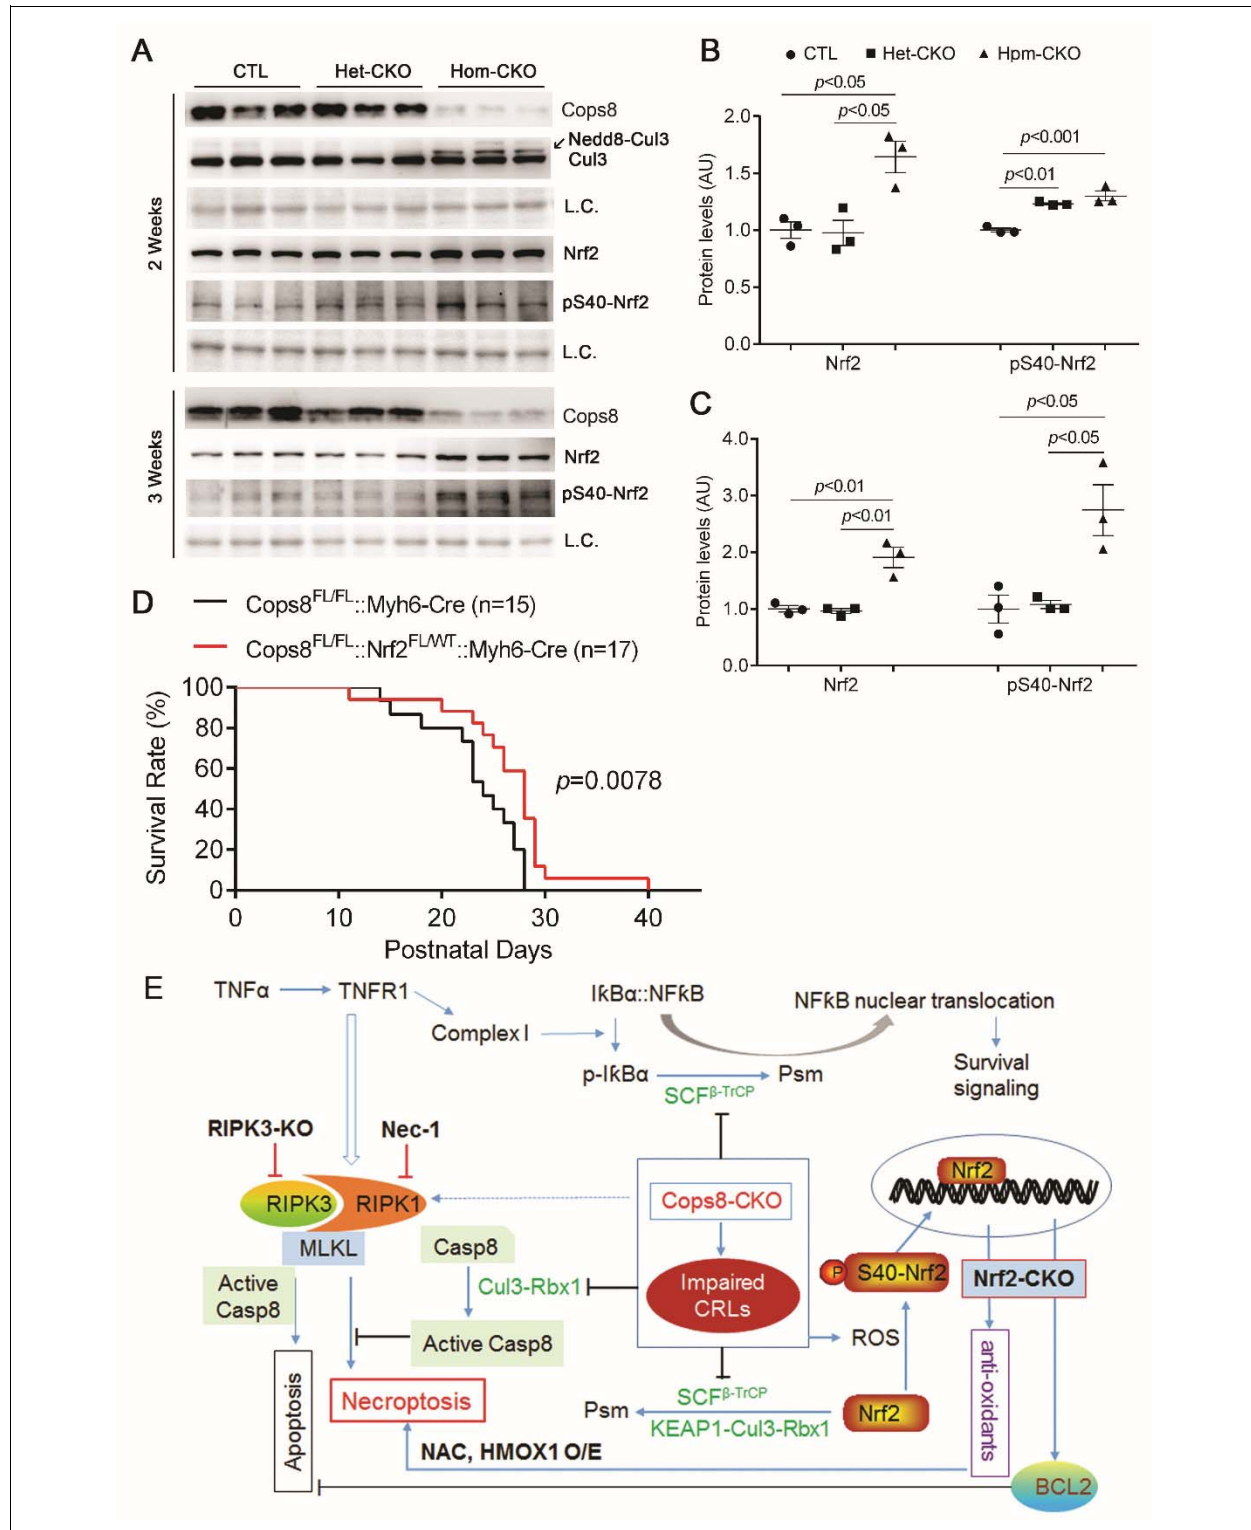

**Figure 8. The Nrf2-BCL2 pathway is activated and contributes to CM necroptosis in *Cops8*<sup>CKO</sup> mouse hearts.** A ~ C, representative images (A) and the summary of densitometry data (B, C) of western blot analyses for the indicated proteins in the ventricular myocardium of

mice of the indicated genotypes at 2 and 3 weeks of age. Here CTL are comprised of Myh6-Cre<sup>TG</sup> mice. One way ANOVA followed by Tukey's test. **D**, Kaplan-Meier survival curve of littermate mice of the indicated genotypes. The median lifespan for Cops8<sup>CKO</sup> mice in the heterozygous Nrf2<sup>CKO</sup> background (Cops8<sup>FL/FL</sup>::Nrf2<sup>FL/WT</sup>::Myh6-Cre) or in the wild type *Nrf2* background (Cops8<sup>FL/FL</sup>::Myh6-Cre) is respectively 28 or 24 days. Log-rank test. Both male and female (roughly 1:1 ratio) were included in all studies. **E**, A working model for induction of CM necroptosis by Cops8 deficiency, with the main interrogations of this study marked with bold black font. Casp8, caspase 8; dot line denotes a potential link that is not tested yet.
